# Supplementary material for: A new library of arsine, stibine-stabilized N-heterocyclic carbene palladium complexes: synthesis, structures and activities in C–C and C–N coupling reactions
Source: Royal Society of Chemistry journal article supplement (doi:10.1039/c4dt01773k), 2014-08-14
Supplement: c4dt01773k1.pdf [file c4dt01773k1.pdf]

Electronic Supplementary Material (ESI) for Dalton Trans  
This journal is © The Royal Society of Chemistry 2014

## Supporting Information

### **New Library of Arsine, Stibine-Stabilized *N*-heterocyclic Carbene Palladium Complexes: Synthesis, Structures and Activities in C–C and C–N Coupling Reactions**

Jin Yang,<sup>a</sup> Pinhua Li,<sup>a</sup> Yicheng Zhang,<sup>a</sup> and Lei Wang<sup>a,b,\*</sup>

<sup>a</sup> Department of Chemistry, Huaibei Normal University, Huaibei, Anhui 235000, P R China  
Tel: + 86-561-3802-069 Fax: + 86-561-3090-518 E-mail: leiwang@chnu.edu.cn

<sup>b</sup> State Key Laboratory of Organometallic Chemistry, Shanghai Institute of Organic Chemistry, Chinese Academy of Sciences, Shanghai 200032, P R China

---

#### *Table of Contents for Supporting Information*

|                                                                                                                        |    |
|------------------------------------------------------------------------------------------------------------------------|----|
| 1. Table S1 Crystallographic data for complexes <b>1a–1d</b> and <b>2a–2d</b> .....                                    | 1  |
| 2. Characterization data for the products.....                                                                         | 3  |
| 3. <sup>1</sup> H and <sup>13</sup> C- <sup>1</sup> H NMR spectra of the complexes <b>1a–1d</b> and <b>2a–2d</b> ..... | 5  |
| 4. <sup>1</sup> H and <sup>13</sup> C- <sup>1</sup> H spectra of the products.....                                     | 13 |
| 5. References.....                                                                                                     | 23 |

**Table S1** Crystallographic data for complexes **1a–1d** and **2a–2d**

| Compound                                                   | <b>1a</b>                                                           | <b>1b</b> •CH <sub>2</sub> Cl <sub>2</sub>                          | <b>(1c)</b> <sub>4</sub> •CH <sub>2</sub> Cl <sub>2</sub>                                         | <b>(1d)</b> <sub>2</sub> •CH <sub>2</sub> Cl <sub>2</sub>                                       |
|------------------------------------------------------------|---------------------------------------------------------------------|---------------------------------------------------------------------|---------------------------------------------------------------------------------------------------|-------------------------------------------------------------------------------------------------|
| formula                                                    | C <sub>39</sub> H <sub>39</sub> AsCl <sub>2</sub> N <sub>2</sub> Pd | C <sub>40</sub> H <sub>41</sub> Cl <sub>4</sub> N <sub>2</sub> PdSb | C <sub>181</sub> H <sub>206</sub> As <sub>4</sub> Cl <sub>10</sub> N <sub>8</sub> Pd <sub>4</sub> | C <sub>91</sub> H <sub>104</sub> Cl <sub>6</sub> N <sub>4</sub> Pd <sub>2</sub> Sb <sub>2</sub> |
| fw                                                         | 787.94                                                              | 919.70                                                              | 3573.32                                                                                           | 1922.78                                                                                         |
| crystal system                                             | monoclinic                                                          | monoclinic                                                          | monoclinic                                                                                        | monoclinic                                                                                      |
| space group                                                | <i>P2(1)/c</i>                                                      | <i>P2(1)/c</i>                                                      | <i>P2(1)/c</i>                                                                                    | <i>C2/c</i>                                                                                     |
| a /Å                                                       | 17.556(7)                                                           | 19.8365(19)                                                         | 24.870(6)                                                                                         | 31.143(6)                                                                                       |
| b /Å                                                       | 13.840(6)                                                           | 13.9429(13)                                                         | 19.199(5)                                                                                         | 13.853(3)                                                                                       |
| c /Å                                                       | 15.138(6)                                                           | 14.4872(14)                                                         | 18.773(4)                                                                                         | 23.658(5)                                                                                       |
| □ $\alpha$ /deg                                            | 90.00                                                               | 90.00                                                               | 90.00                                                                                             | 90.00                                                                                           |
| □ $\beta$ /deg                                             | 92.799(7)                                                           | 91.9250(10)                                                         | 101.939(5)                                                                                        | 114.411(3)                                                                                      |
| □ $\gamma$ /deg                                            | 90.00                                                               | 90.00                                                               | 90.00                                                                                             | 90.00                                                                                           |
| <i>V</i> /Å <sup>3</sup>                                   | 3674(3)                                                             | 4004.6(7)                                                           | 8770(3)                                                                                           | 9294(3)                                                                                         |
| <i>Z</i>                                                   | 4                                                                   | 4                                                                   | 2                                                                                                 | 4                                                                                               |
| D <sub>calc</sub> /g cm <sup>-3</sup>                      | 1.425                                                               | 1.525                                                               | 1.353                                                                                             | 1.374                                                                                           |
| <i>F</i> (000)                                             | 1600                                                                | 1840                                                                | 3668                                                                                              | 3896                                                                                            |
| $\mu$ /mm <sup>-1</sup>                                    | 1.573                                                               | 1.420                                                               | 1.356                                                                                             | 1.171                                                                                           |
| GOF                                                        | 1.049                                                               | 1.030                                                               | 0.997                                                                                             | 1.016                                                                                           |
| reflections collected                                      | 17968                                                               | 19934                                                               | 44371                                                                                             | 23266                                                                                           |
| independent reflections ( <i>R</i> <sub>int</sub> )        | 6452 (0.0551)                                                       | 7054 (0.0210)                                                       | 15414 (0.0967)                                                                                    | 8158 (0.0248)                                                                                   |
| observed reflections [ <i>I</i> > 2 $\sigma$ ( <i>I</i> )] | 4825                                                                | 6085                                                                | 7894                                                                                              | 6540                                                                                            |
| refined parameters                                         | 412                                                                 | 449                                                                 | 872                                                                                               | 495                                                                                             |
| <i>R</i> 1 [ <i>I</i> > 2 $\sigma$ ( <i>I</i> )]           | 0.0495                                                              | 0.0277                                                              | 0.0525                                                                                            | 0.0308                                                                                          |
| <i>wR</i> 2 (all data)                                     | 0.1522                                                              | 0.0687                                                              | 0.1352                                                                                            | 0.0765                                                                                          |

| Compound                                                   | <b>2a</b>                                                           | <b>(2b)•CH<sub>2</sub>Cl<sub>2</sub></b>                            | <b>2c•0.5CH<sub>2</sub>Cl<sub>2</sub></b>                             | <b>2d</b>                                                           |
|------------------------------------------------------------|---------------------------------------------------------------------|---------------------------------------------------------------------|-----------------------------------------------------------------------|---------------------------------------------------------------------|
| formula                                                    | C <sub>39</sub> H <sub>41</sub> AsCl <sub>2</sub> N <sub>2</sub> Pd | C <sub>40</sub> H <sub>43</sub> Cl <sub>4</sub> N <sub>2</sub> PdSb | C <sub>45.5</sub> H <sub>54</sub> AsCl <sub>3</sub> N <sub>2</sub> Pd | C <sub>45</sub> H <sub>53</sub> Cl <sub>2</sub> N <sub>2</sub> PdSb |
| fw                                                         | 789.96                                                              | 921.71                                                              | 916.58                                                                | 920.94                                                              |
| crystal system                                             | monoclinic                                                          | monoclinic                                                          | monoclinic                                                            | hexagonal                                                           |
| space group                                                | <i>P2(1)/c</i>                                                      | <i>P2(1)/c</i>                                                      | <i>P2(1)/n</i>                                                        | <i>P</i> $\bar{6}$ 5                                                |
| a /Å                                                       | 17.317(6)                                                           | 19.780(3)                                                           | 10.684(4)                                                             | 25.982(5)                                                           |
| b /Å                                                       | 13.876(5)                                                           | 13.9846(17)                                                         | 12.179(5)                                                             | 25.982(5)                                                           |
| c /Å                                                       | 15.020(5)                                                           | 14.4282(18)                                                         | 35.633(13)                                                            | 12.486(2)                                                           |
| □ $\alpha$ /deg                                            | 90.00                                                               | 90.00                                                               | 90.00                                                                 | 90.00                                                               |
| □ $\beta$ /deg                                             | 92.337(5)                                                           | 92.037(2)                                                           | 93.220(6)                                                             | 90.00                                                               |
| □ $\gamma$ /deg                                            | 90.00                                                               | 90.00                                                               | 90.00                                                                 | 120.00                                                              |
| <i>V</i> /Å <sup>3</sup>                                   | 3606(2)                                                             | 3988.5(9)                                                           | 4629(3)                                                               | 7299(2)                                                             |
| Z                                                          | 4                                                                   | 4                                                                   | 4                                                                     | 6                                                                   |
| D <sub>calc</sub> /g cm <sup>-3</sup>                      | 1.455                                                               | 1.535                                                               | 1.315                                                                 | 1.257                                                               |
| <i>F</i> (000)                                             | 1608                                                                | 1848                                                                | 1884                                                                  | 2808                                                                |
| $\mu$ /mm <sup>-1</sup>                                    | 1.603                                                               | 1.426                                                               | 1.314                                                                 | 1.062                                                               |
| GOF                                                        | 1.043                                                               | 1.011                                                               | 1.082                                                                 | 1.111                                                               |
| reflections collected                                      | 18014                                                               | 19915                                                               | 22942                                                                 | 36826                                                               |
| independent reflections ( <i>R</i> <sub>int</sub> )        | 6327 (0.0262)                                                       | 7009 (0.0196)                                                       | 8110 (0.0300)                                                         | 8505 (0.0312)                                                       |
| observed reflections [ <i>I</i> > 2 $\sigma$ ( <i>I</i> )] | 6327                                                                | 6052                                                                | 7035                                                                  | 7827                                                                |
| refined parameters                                         | 400                                                                 | 449                                                                 | 468                                                                   | 457                                                                 |
| <i>R</i> 1 [ <i>I</i> > 2 $\sigma$ ( <i>I</i> )]           | 0.0297                                                              | 0.0266                                                              | 0.0348                                                                | 0.0397                                                              |
| <i>wR</i> 2 (all data)                                     | 0.0797                                                              | 0.0730                                                              | 0.0751                                                                | 0.1028                                                              |

## Characterization data for the products

### 4-Methoxybiphenyl<sup>1</sup>

<sup>1</sup>H NMR (400 MHz, CDCl<sub>3</sub>):  $\delta$  = 7.55–7.51 (m, 4H), 7.40 (t,  $J$  = 8.0 Hz, 2H), 7.29 (t,  $J$  = 7.6 Hz, 1H), 6.97 (d,  $J$  = 8.8 Hz, 2H), 3.87 (3H, s).

<sup>13</sup>C NMR (100 MHz, CDCl<sub>3</sub>):  $\delta$  = 159.1, 140.8, 133.7, 128.7, 128.1, 126.7, 126.6, 114.2, 55.3.

### 3-Methoxybiphenyl<sup>1</sup>

<sup>1</sup>H NMR (400 MHz, CDCl<sub>3</sub>):  $\delta$  = 7.52 (d,  $J$  = 7.2 Hz, 2H), 7.40 (t,  $J$  = 7.2 Hz, 2H), 7.32–7.29 (3H, m), 7.02 (d,  $J$  = 7.6 Hz, 1H), 6.98 (t,  $J$  = 8.4 Hz, 1H), 3.78 (3H, s).

<sup>13</sup>C NMR (100 MHz, CDCl<sub>3</sub>):  $\delta$  = 156.4, 138.5, 130.8, 130.6, 129.5, 128.6, 127.9, 126.9, 120.8, 111.1, 55.5.

### 2-Methoxybiphenyl<sup>1</sup>

<sup>1</sup>H NMR (400 MHz, CDCl<sub>3</sub>):  $\delta$  = 7.58–7.56 (m, 2H), 7.43–7.39 (m, 2H), 7.35–7.31 (m, 2H), 7.17–7.12 (m, 2H), 6.89–6.86 (m, 1H), 3.82 (s, 3H).

<sup>13</sup>C NMR (100 MHz, CDCl<sub>3</sub>):  $\delta$  = 159.9, 142.7, 141.0, 129.7, 128.7, 127.4, 127.1, 119.6, 112.8, 112.6, 55.2.

### 2-Phenylpyridine<sup>1</sup>

<sup>1</sup>H NMR (400 MHz, CDCl<sub>3</sub>):  $\delta$  = 8.60–8.58 (m, 1H), 7.90 (d,  $J$  = 7.2 Hz, 2H), 7.59–7.58 (2H, m), 7.39–7.35 (m, 2H), 7.32–7.28 (m, 1H), 7.10–7.07 (m, 1H).

<sup>13</sup>C NMR (100 MHz, CDCl<sub>3</sub>):  $\delta$  = 157.3, 149.5, 139.2, 136.6, 128.8, 128.6, 126.8, 121.9, 120.4.

### 3-Phenylpyridine<sup>1</sup>

<sup>1</sup>H NMR (400 MHz, CDCl<sub>3</sub>):  $\delta$  = 8.75 (s, 1H), 8.50–8.49 (m, 1H), 7.78–7.76 (m, 1H), 7.48 (d,  $J$  = 7.2 Hz, 2H), 7.40–7.36 (t,  $J$  = 7.2 Hz, 2H), 7.32–7.27 (m, 2H).

<sup>13</sup>C NMR (100 MHz, CDCl<sub>3</sub>):  $\delta$  = 148.4, 148.3, 137.8, 136.6, 134.3, 129.0, 128.1, 127.1, 123.5.

### 4-Methyl-*N*-phenylaniline<sup>2</sup>

<sup>1</sup>H NMR (400 MHz, CDCl<sub>3</sub>):  $\delta$  = 7.28 (t,  $J$  = 7.2 Hz, 2H), 7.13 (d,  $J$  = 7.6 Hz, 2H), 7.06–7.04 (m, 4H), 6.92 (t,  $J$  = 7.2 Hz, 1H), 5.64 (s, 1H), 2.35 (s, 3H).

<sup>13</sup>C NMR (100 MHz, CDCl<sub>3</sub>):  $\delta$  = 143.8, 140.2, 130.8, 129.8, 129.2, 120.2, 118.8, 116.7, 20.6.

### 4-Methoxy-*N*-phenylaniline<sup>2</sup>

<sup>1</sup>H NMR (400 MHz, CDCl<sub>3</sub>):  $\delta$  = 7.24 (t,  $J$  = 7.6 Hz, 2H), 7.10 (d,  $J$  = 8.4 Hz, 2H), 6.94–6.84 (m, 5H), 5.52 (s, 1H), 3.82 (s, 3H).

<sup>13</sup>C NMR (100 MHz, CDCl<sub>3</sub>):  $\delta$  = 155.1, 145.0, 135.6, 129.2, 122.1, 119.4, 115.5, 114.5, 55.5.

### *N*-(4-Methylphenyl)-2,6-dimethylaniline<sup>2</sup>

<sup>1</sup>H NMR (400 MHz, CDCl<sub>3</sub>):  $\delta$  = 7.15 (d,  $J$  = 6.8 Hz, 2H), 7.11 (d,  $J$  = 6.0 Hz, 1H), 7.01 (d,  $J$  = 8.0 Hz, 2H), 6.47 (d,  $J$  = 8.0 Hz, 1H), 5.13 (s, 1H), 2.29 (s, 3H), 2.25 (s, 6H).

<sup>13</sup>C NMR (100 MHz, CDCl<sub>3</sub>):  $\delta$  = 143.8, 138.6, 135.4, 129.6, 128.4, 127.4, 125.3, 113.7, 20.4, 18.3.

***N*-(4-Methoxyphenyl)-2,6-dimethylaniline<sup>2</sup>**

<sup>1</sup>H NMR (400 MHz, CDCl<sub>3</sub>): δ = 7.15 (d, *J* = 6.8 Hz, 2H), 7.11 (d, *J* = 6.0 Hz, 1H), 7.01 (d, *J* = 8.0 Hz, 2H), 6.47 (d, *J* = 8.0 Hz, 2H), 5.13 (s, 1H), 2.29 (s, 3H), 2.25 (s, 6H).

<sup>13</sup>C NMR (100 MHz, CDCl<sub>3</sub>): δ = 152.7, 140.1, 139.2, 134.9, 128.6, 125.0, 115.2, 114.7, 55.6, 18.3.

***N*-(2,6-Dimethylphenyl)naphthalen-2-amine<sup>3</sup>**

<sup>1</sup>H NMR (400 MHz, CDCl<sub>3</sub>): δ = 7.76–7.72 (m, 2H), 7.56 (d, *J* = 8.4 Hz, 1H), 7.38 (t, *J* = 7.2 Hz, 1H), 7.28–7.20 (m, 4H), 7.03 (d, *J* = 7.2 Hz, 1H), 6.65 (s, 1H), 2.31 (s, 6H).

<sup>13</sup>C NMR (100 MHz, CDCl<sub>3</sub>): δ = 143.6, 137.8, 136.0, 134.9, 129.1, 128.6, 127.6, 126.3, 126.0, 126.0, 122.3, 117.6, 106.5, 18.3.

**<sup>1</sup>H NMR and <sup>13</sup>C NMR spectra**

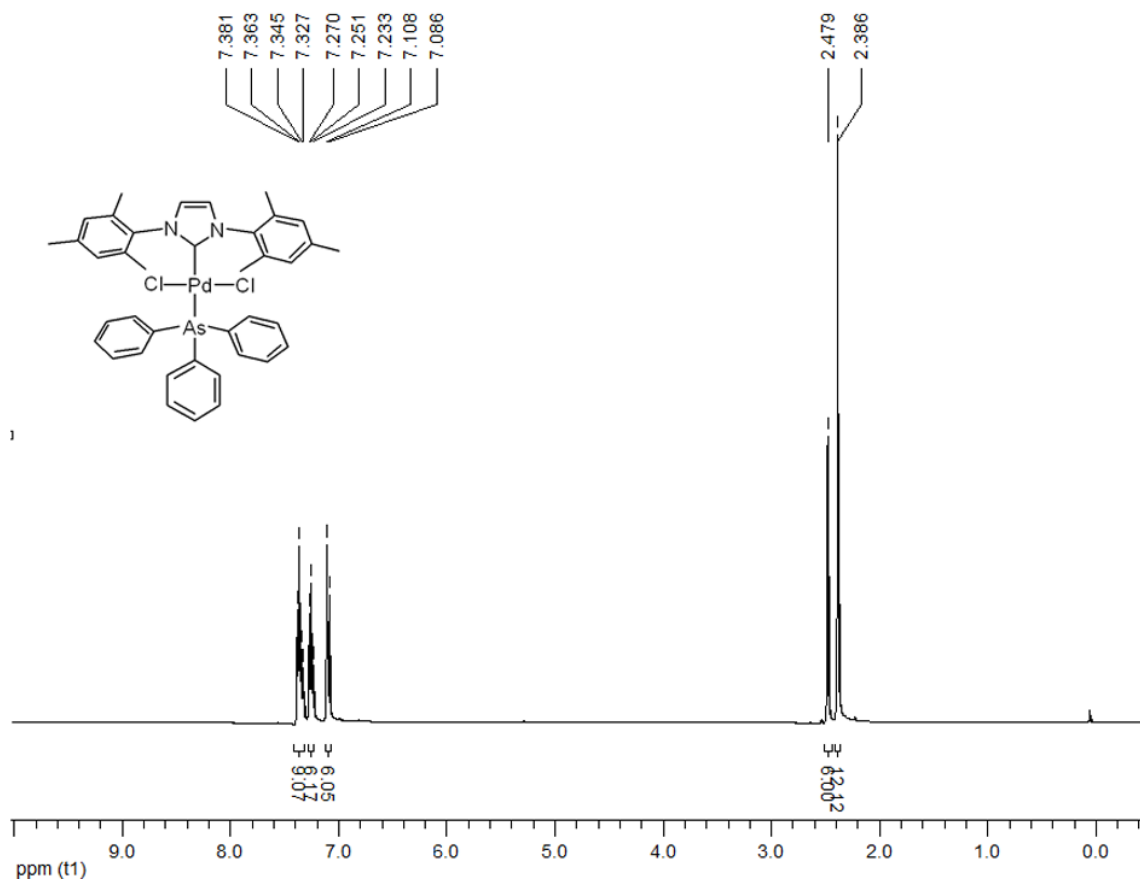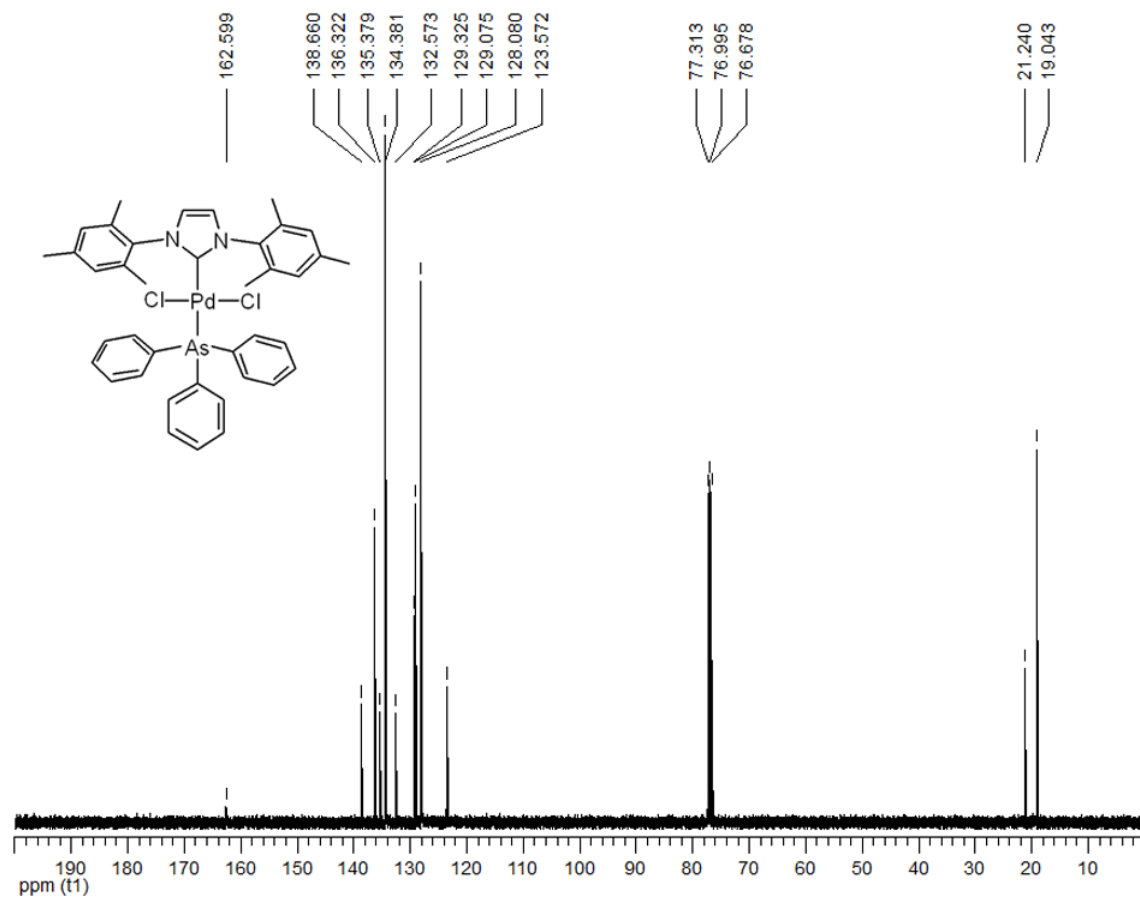



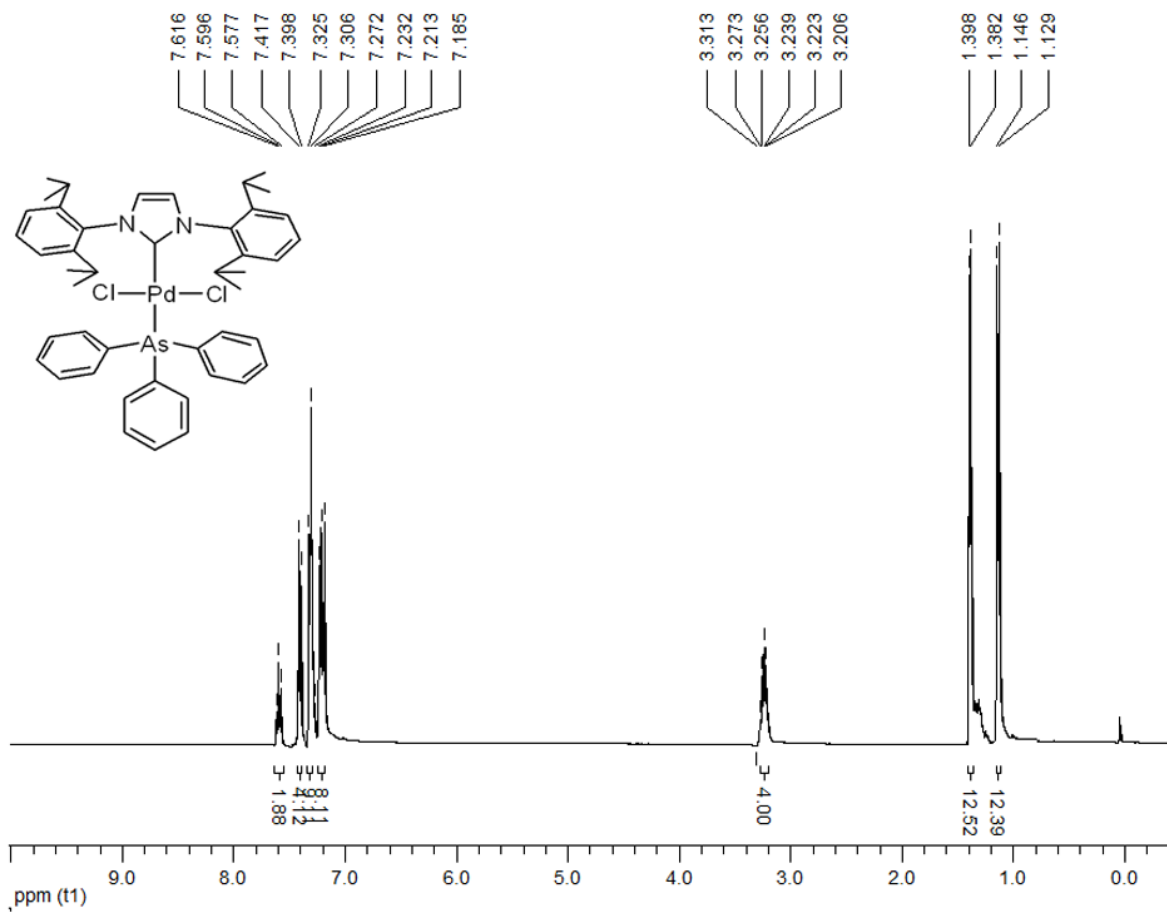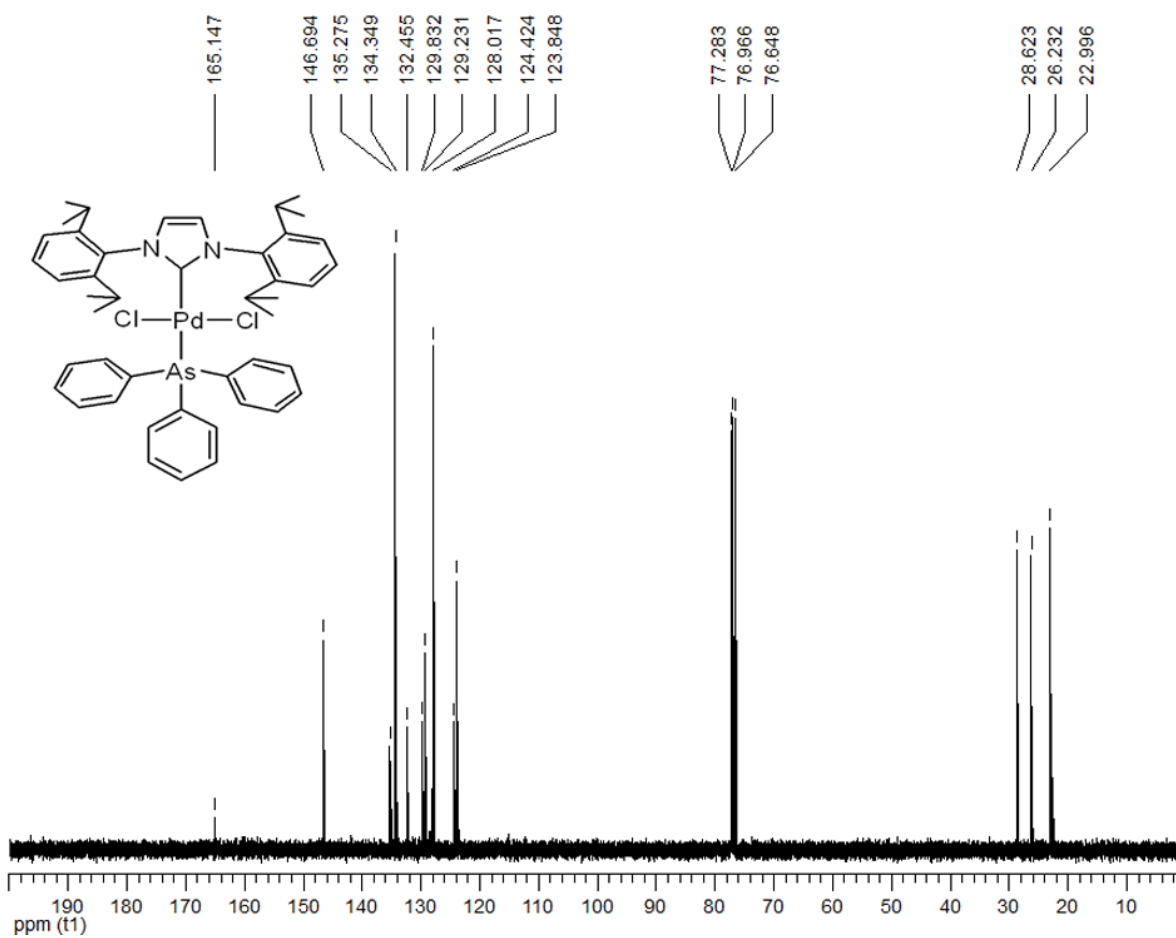



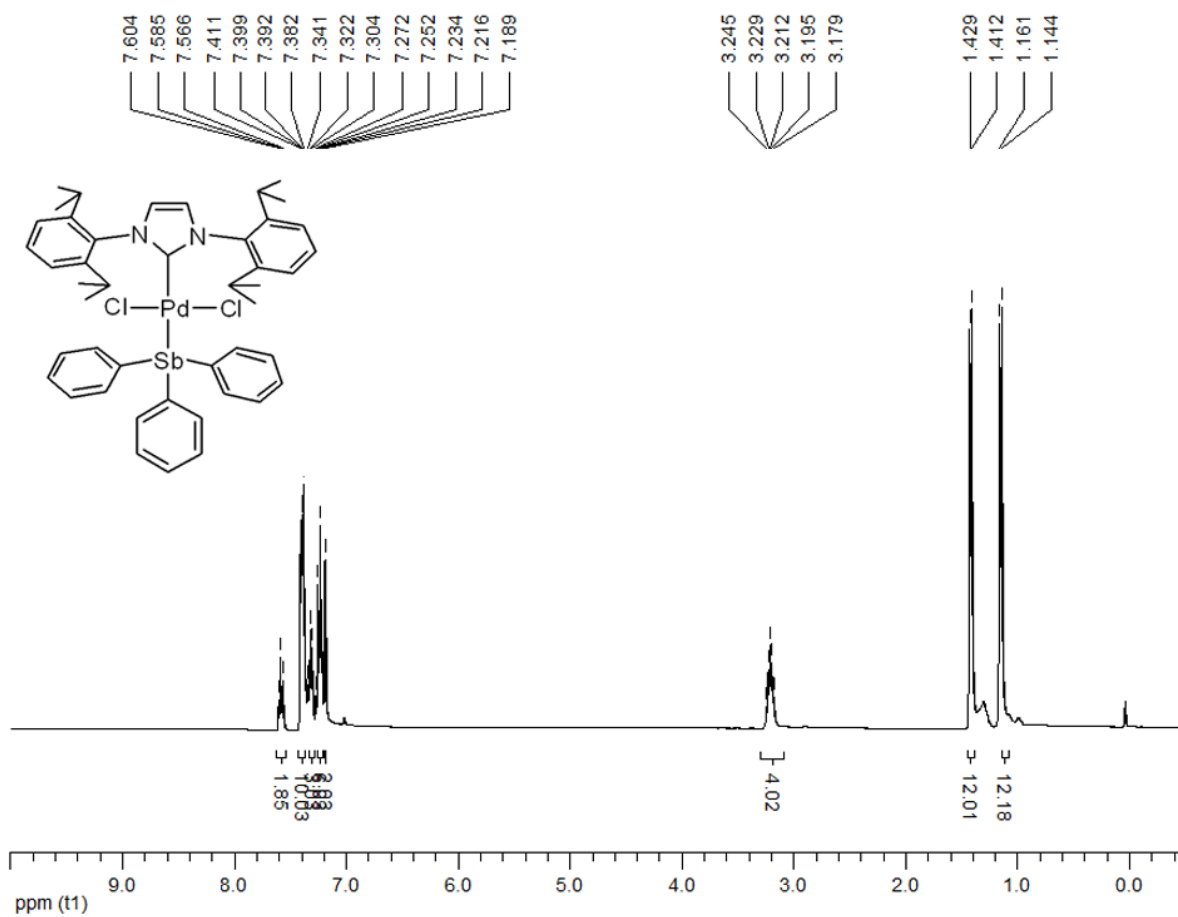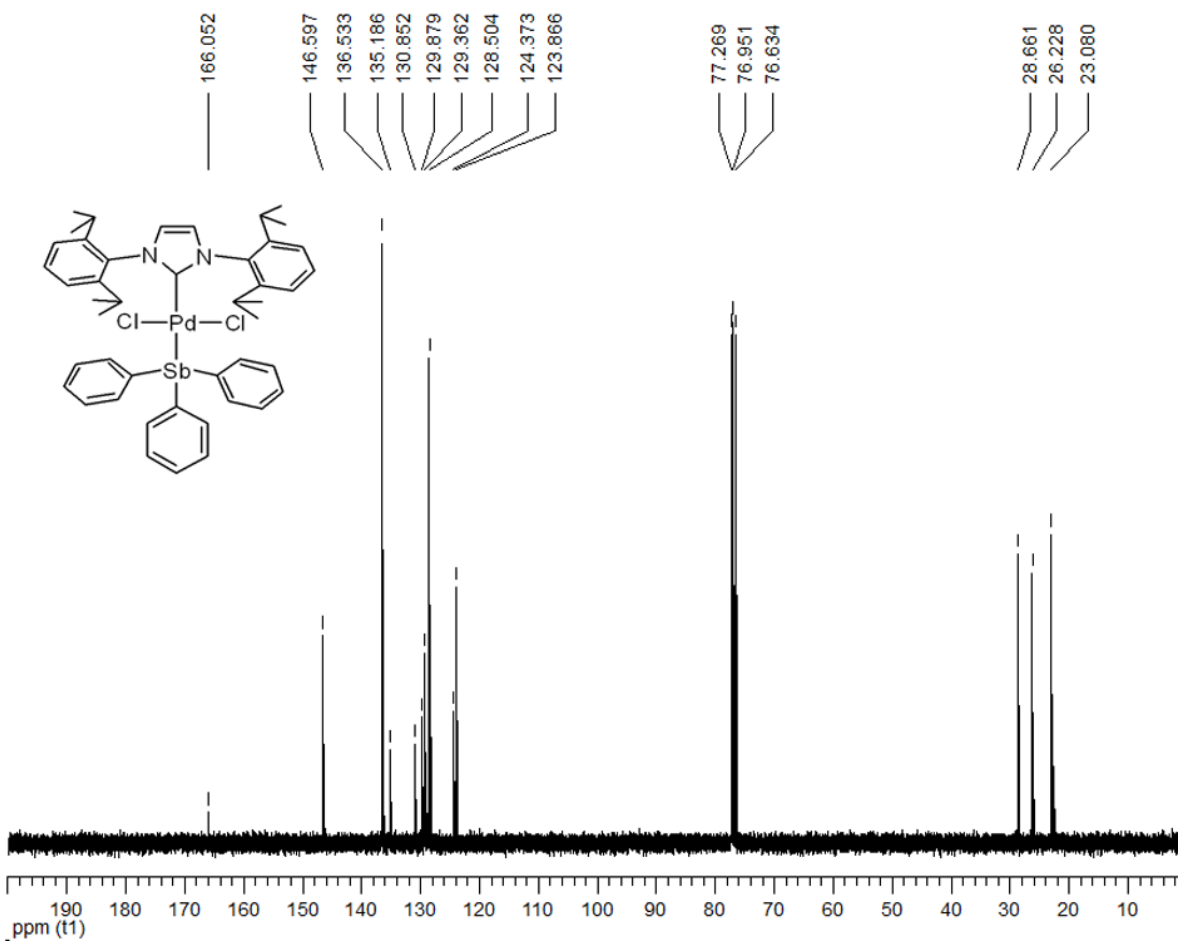

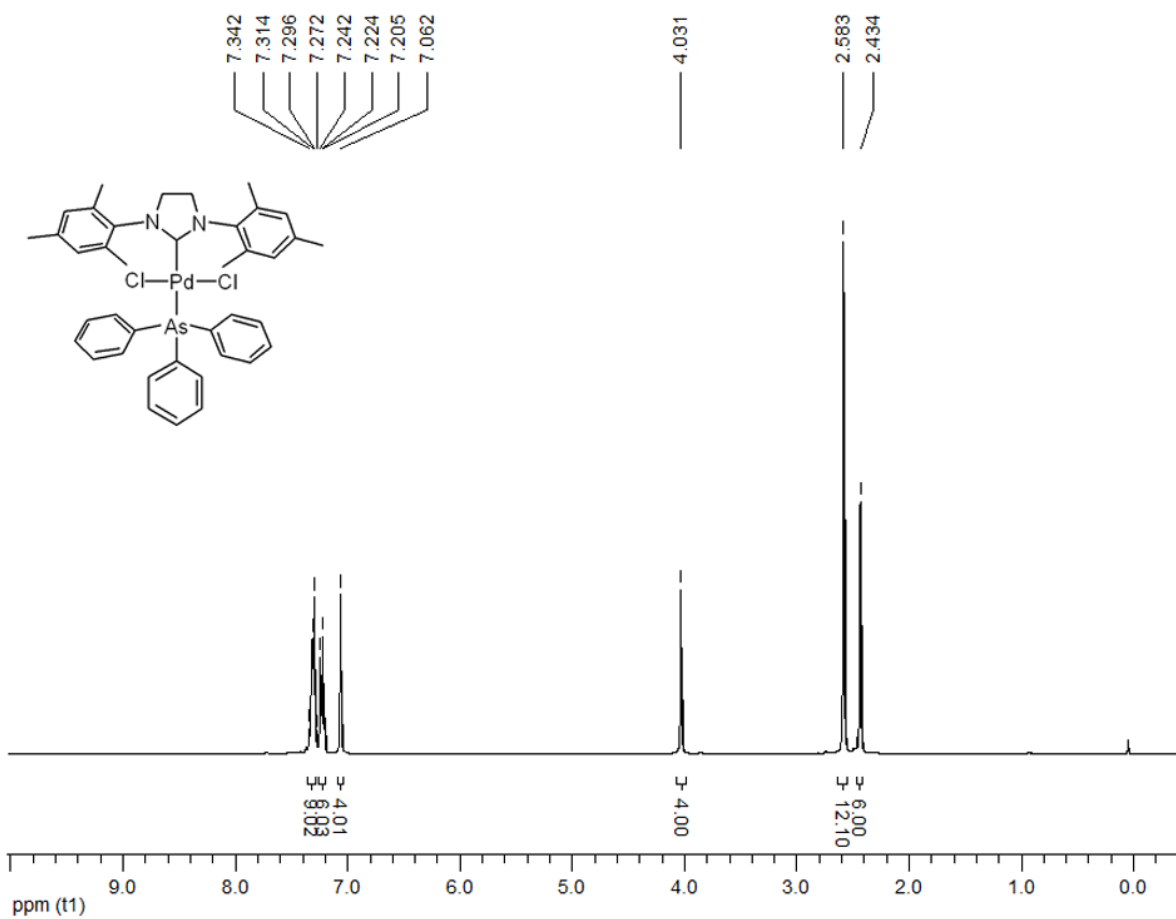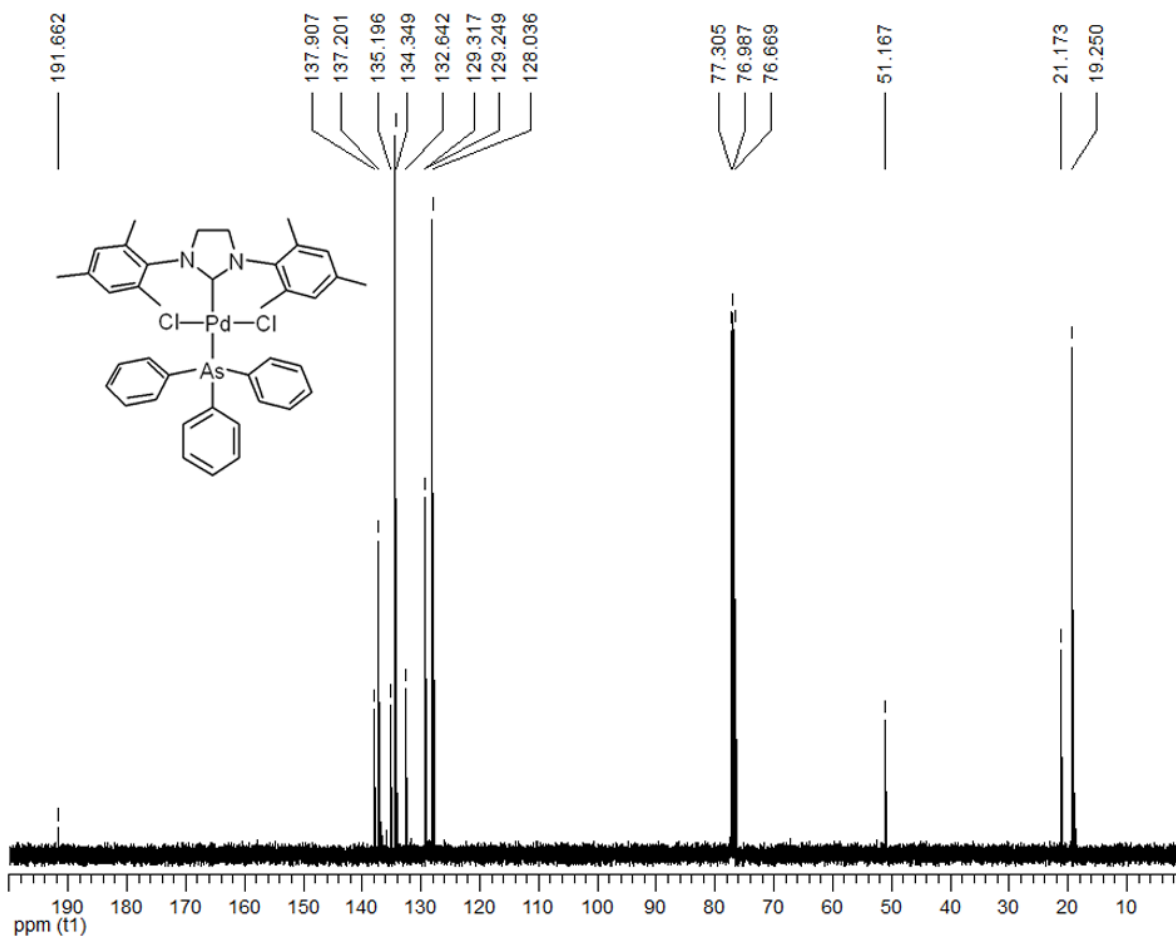

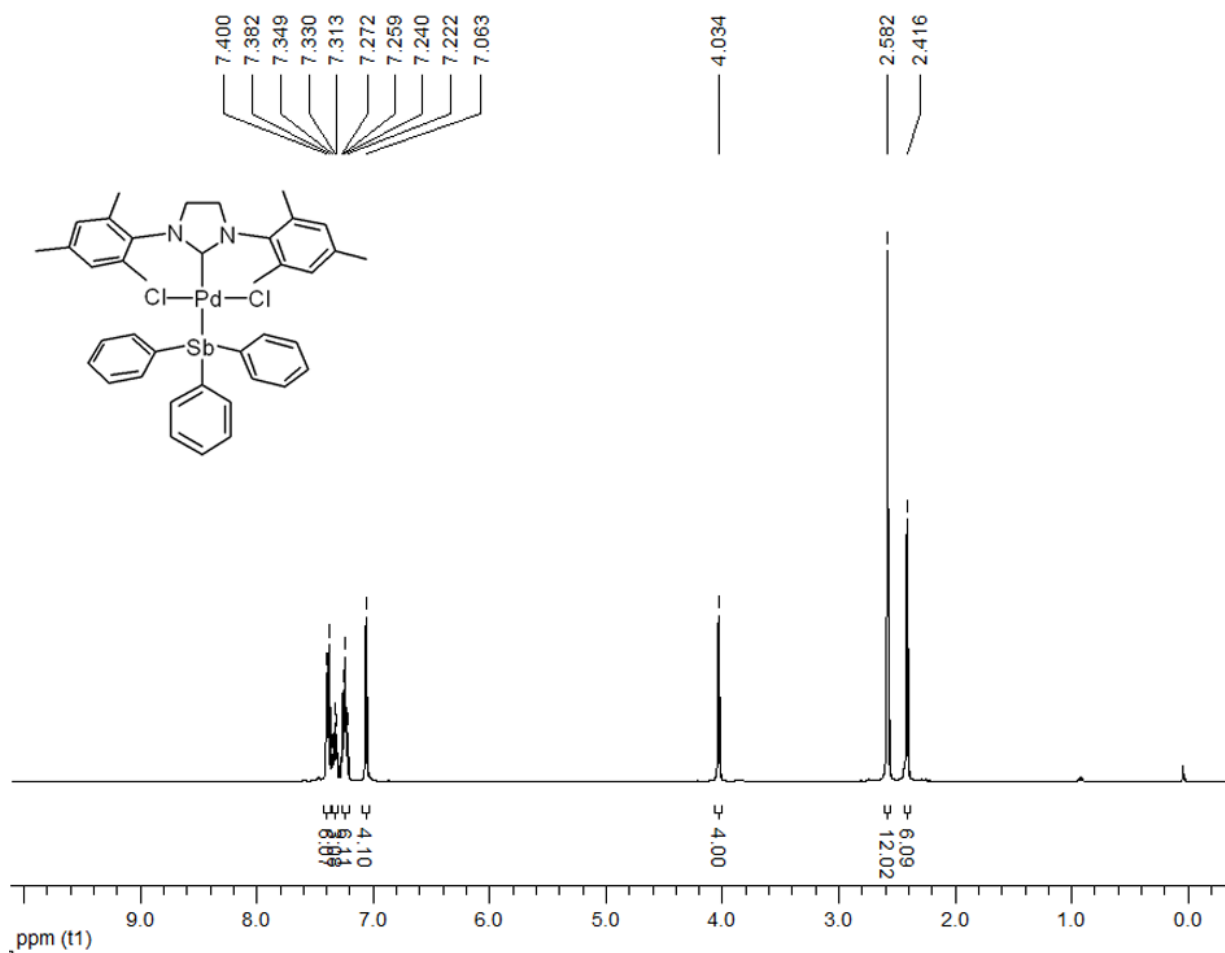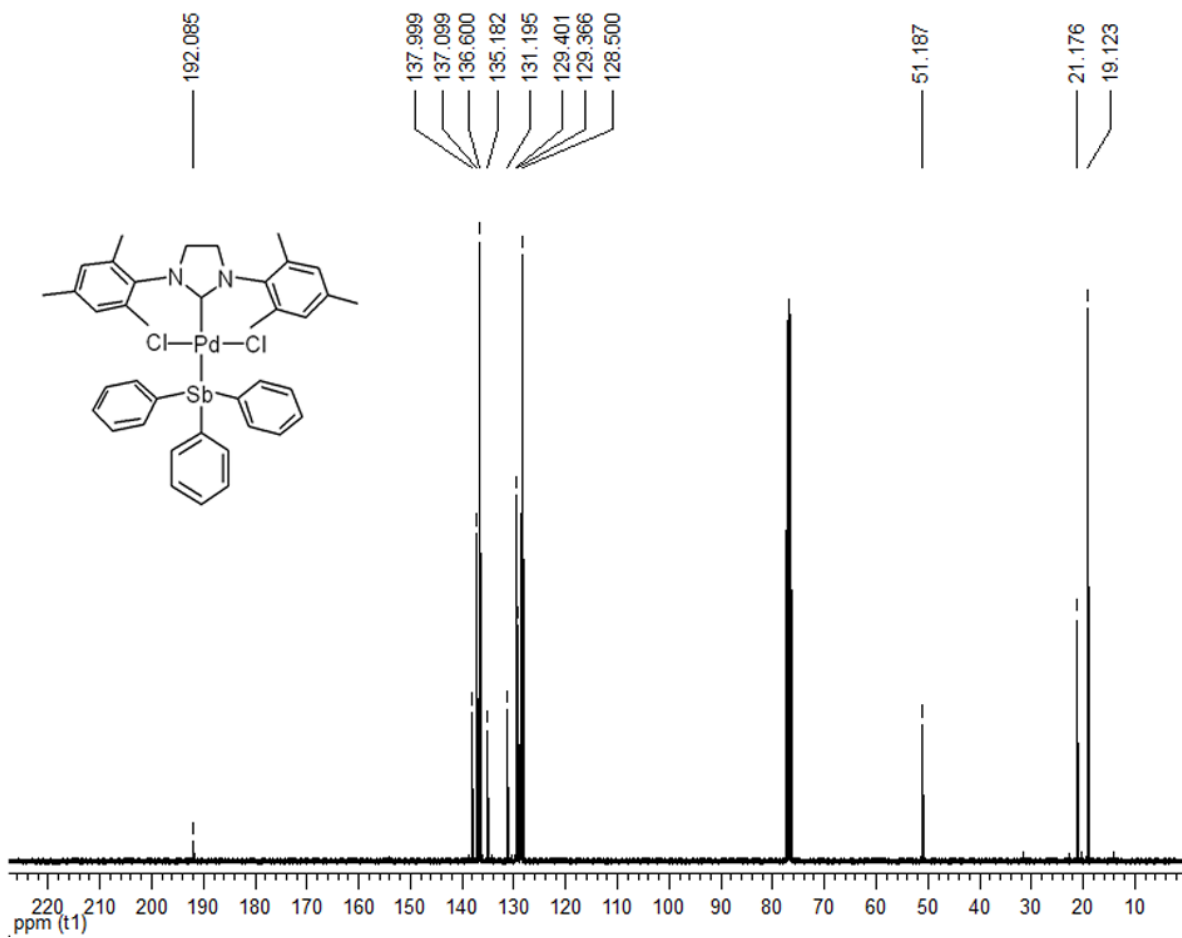

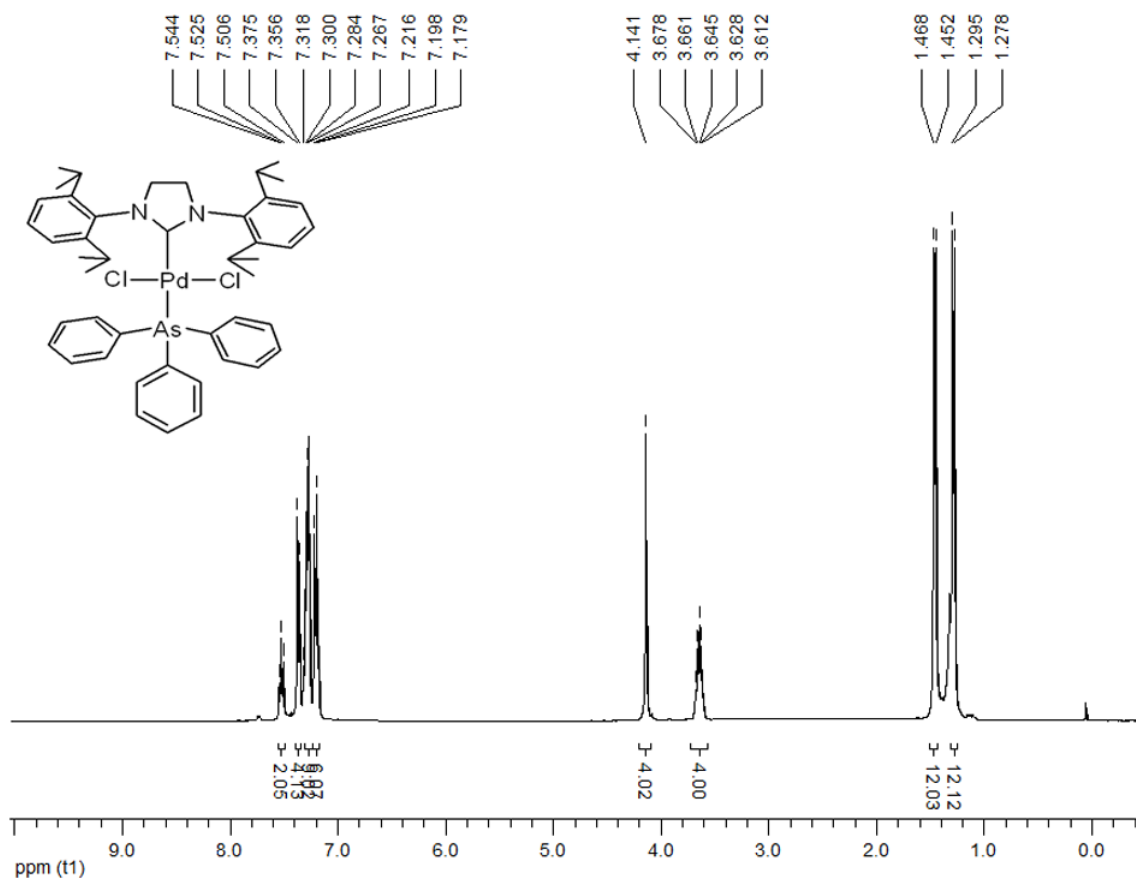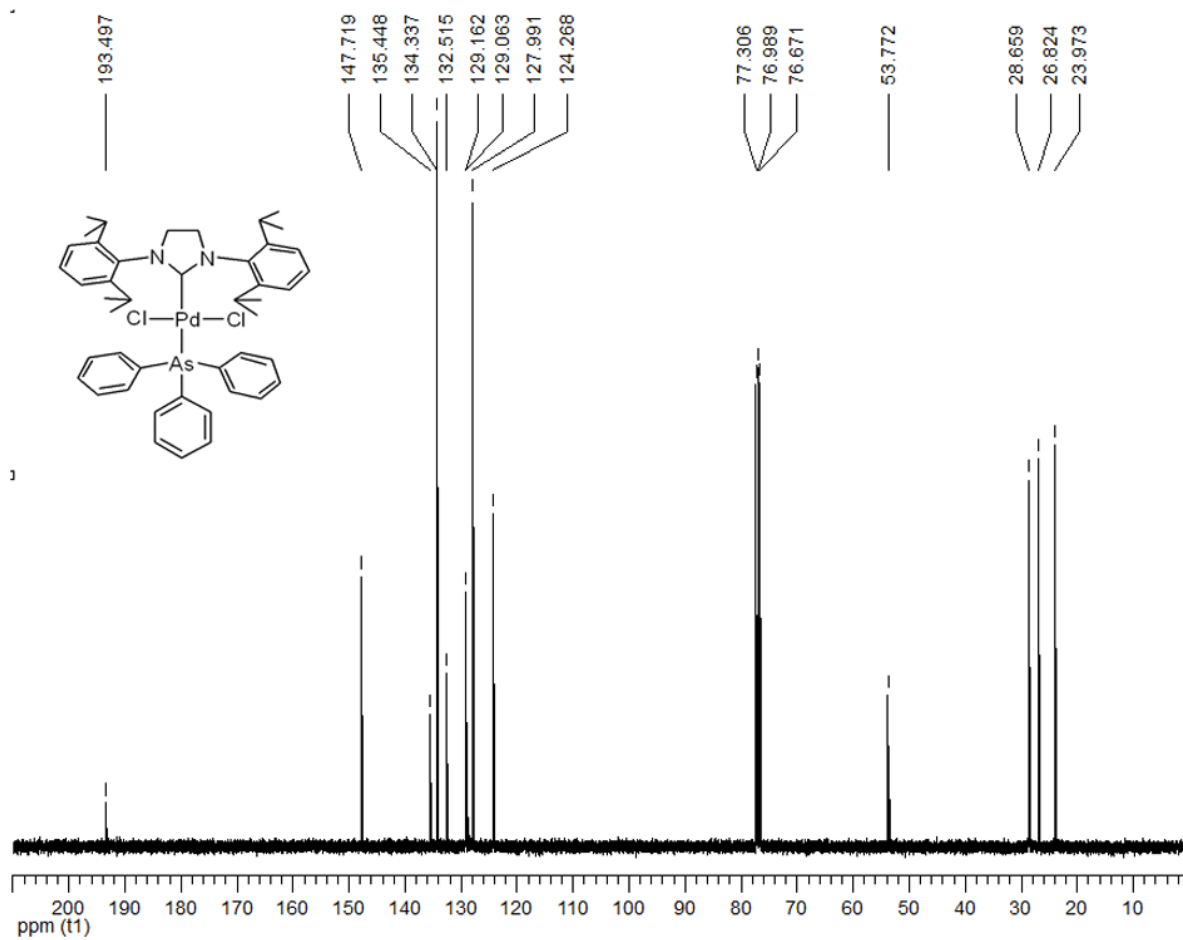

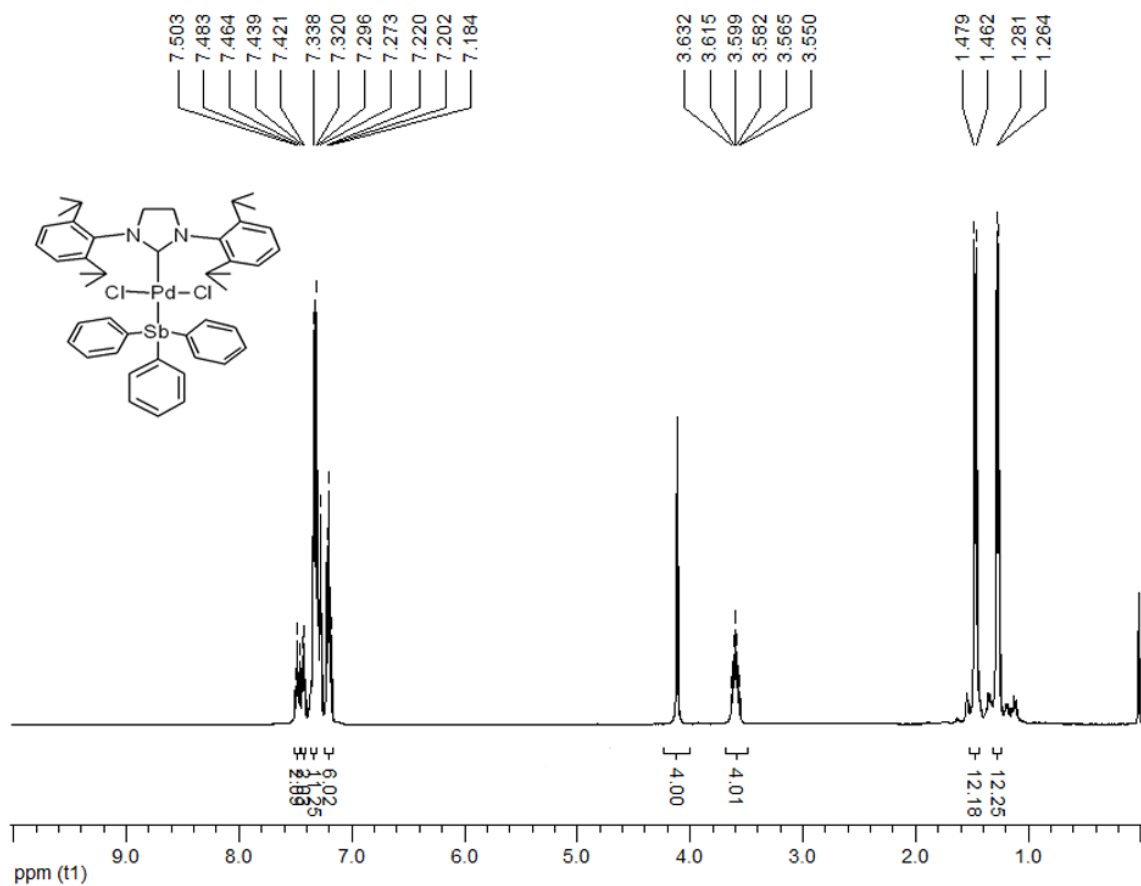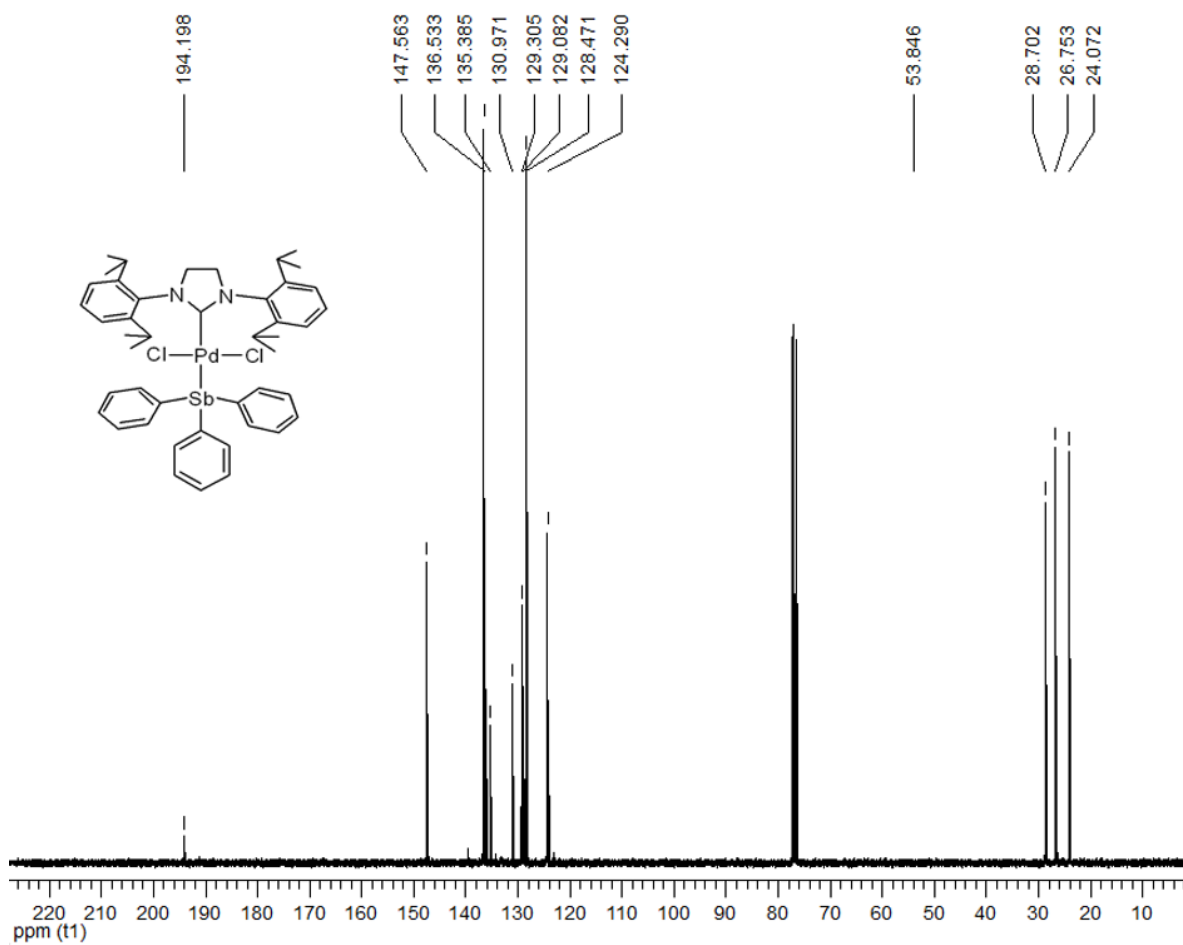

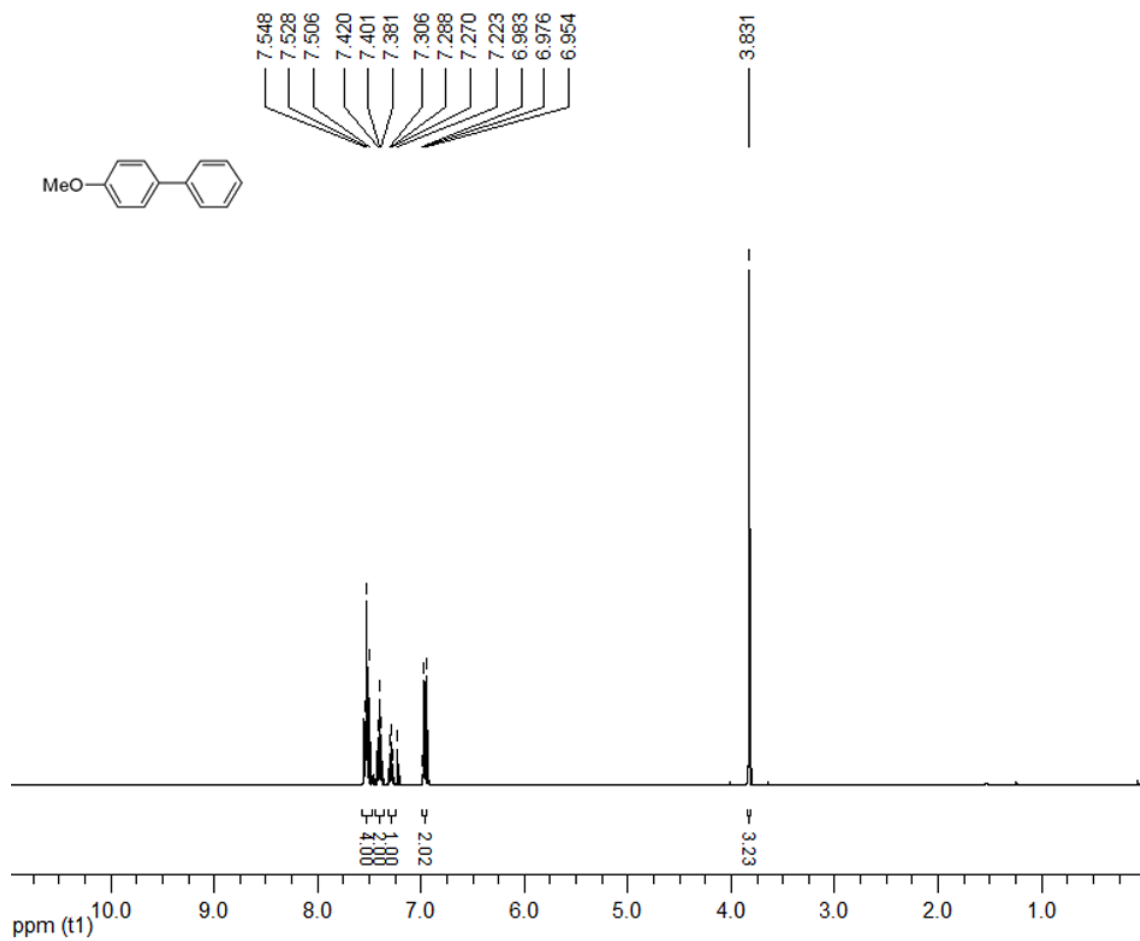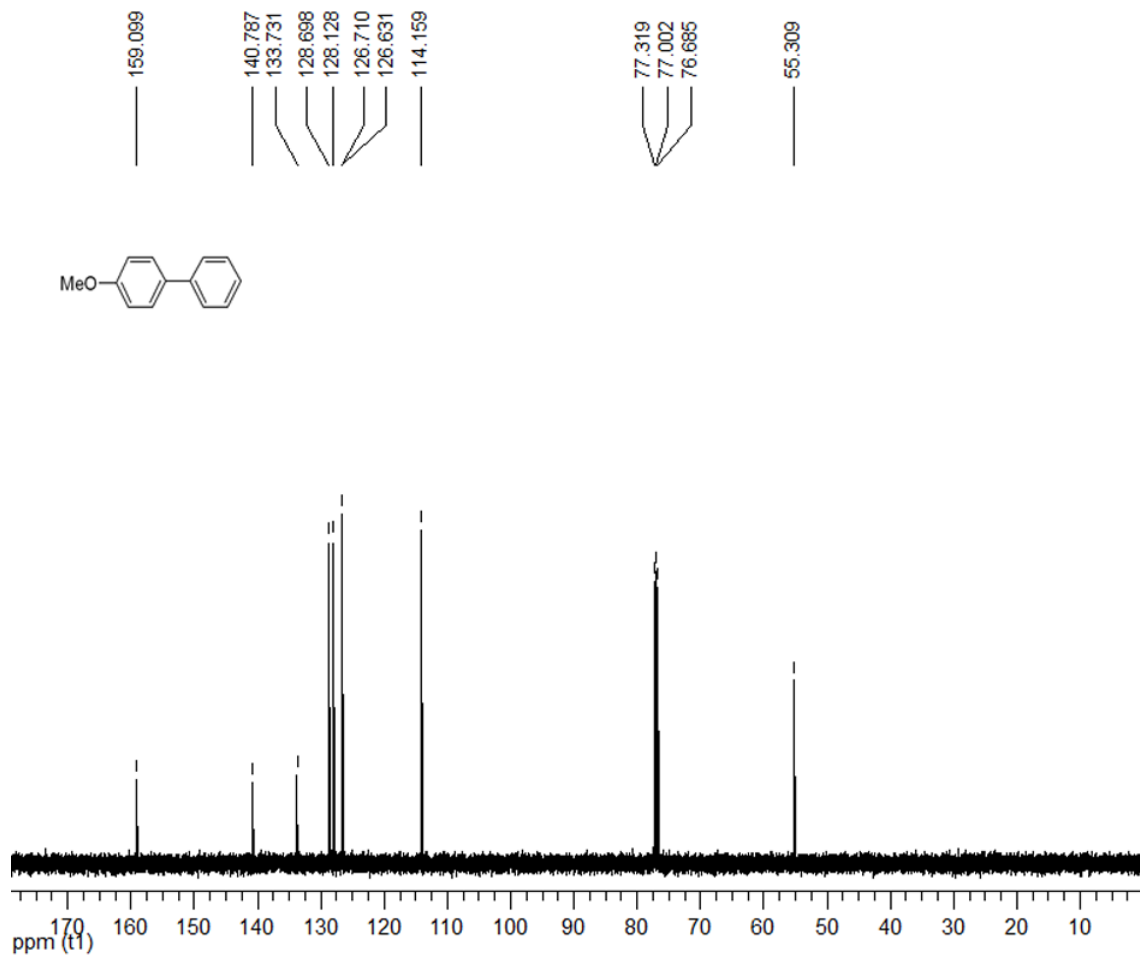

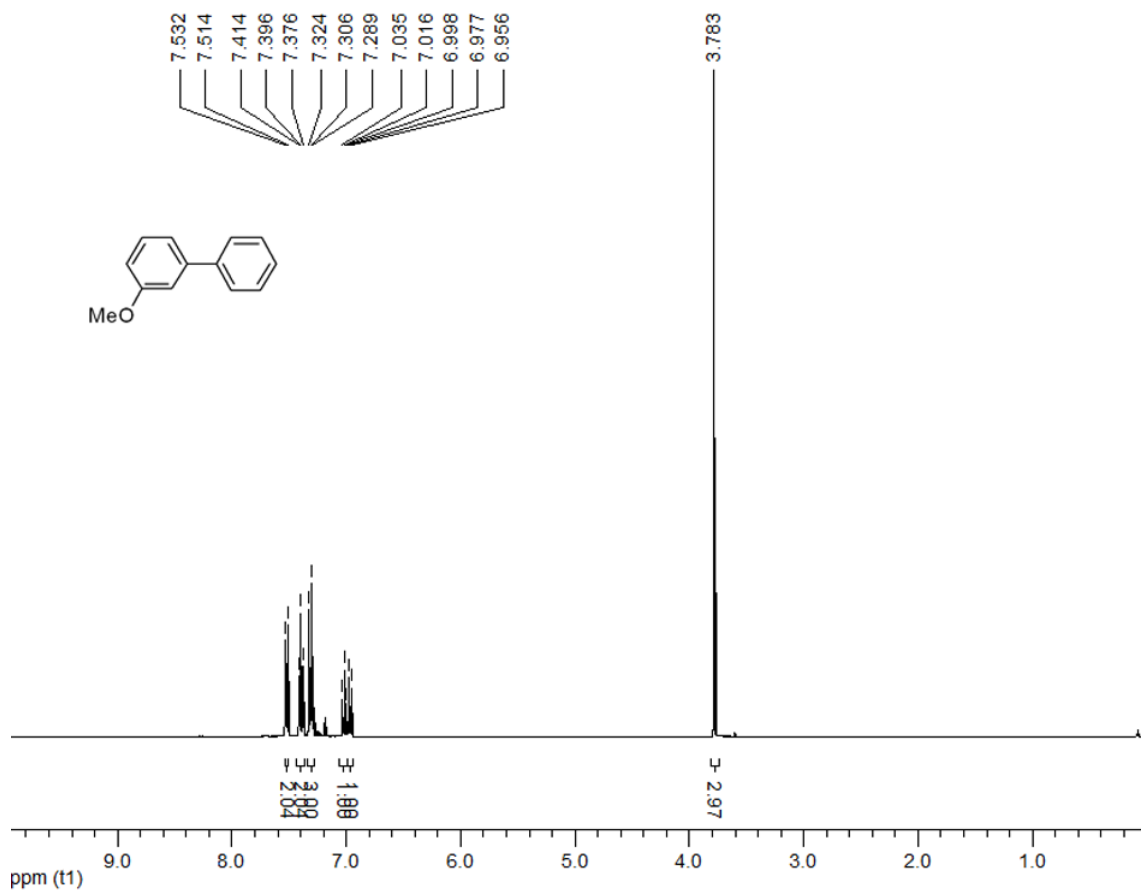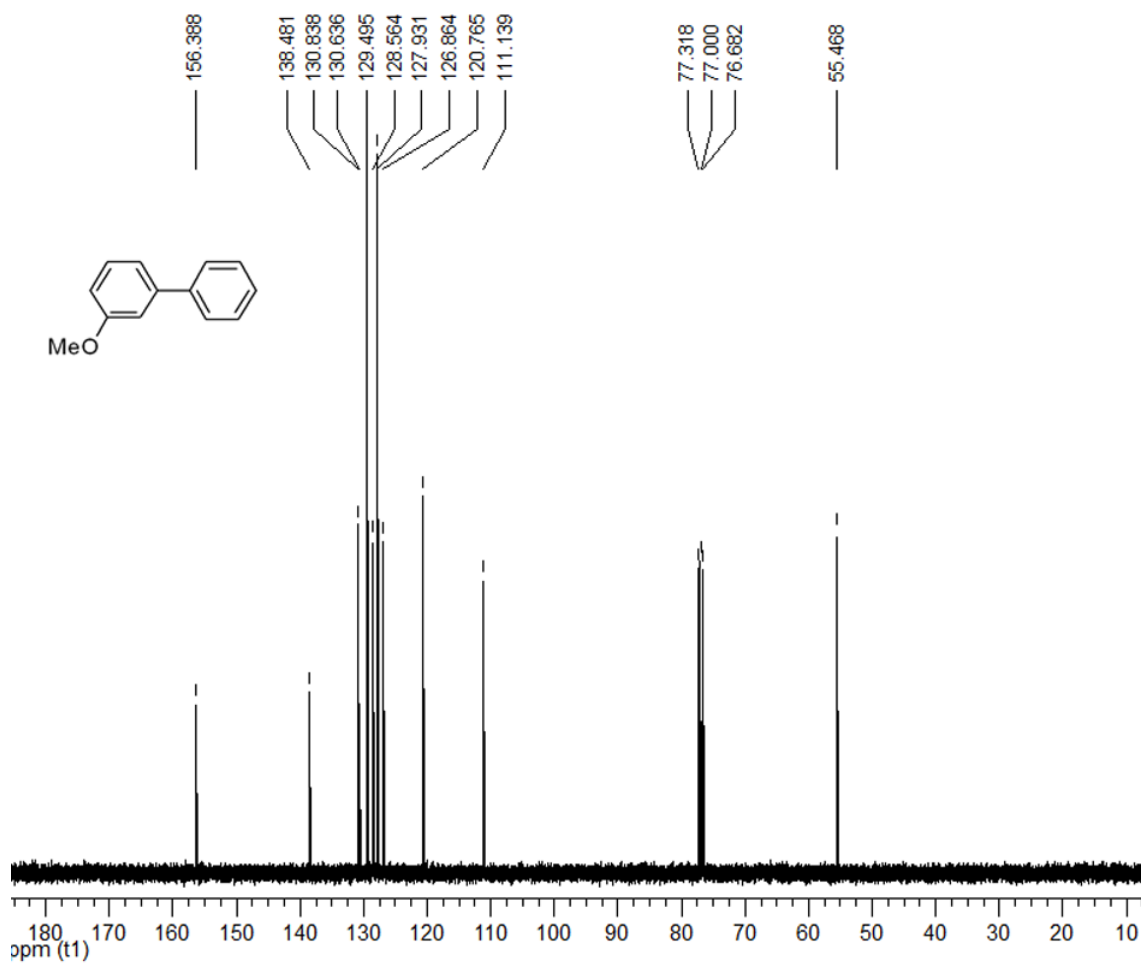





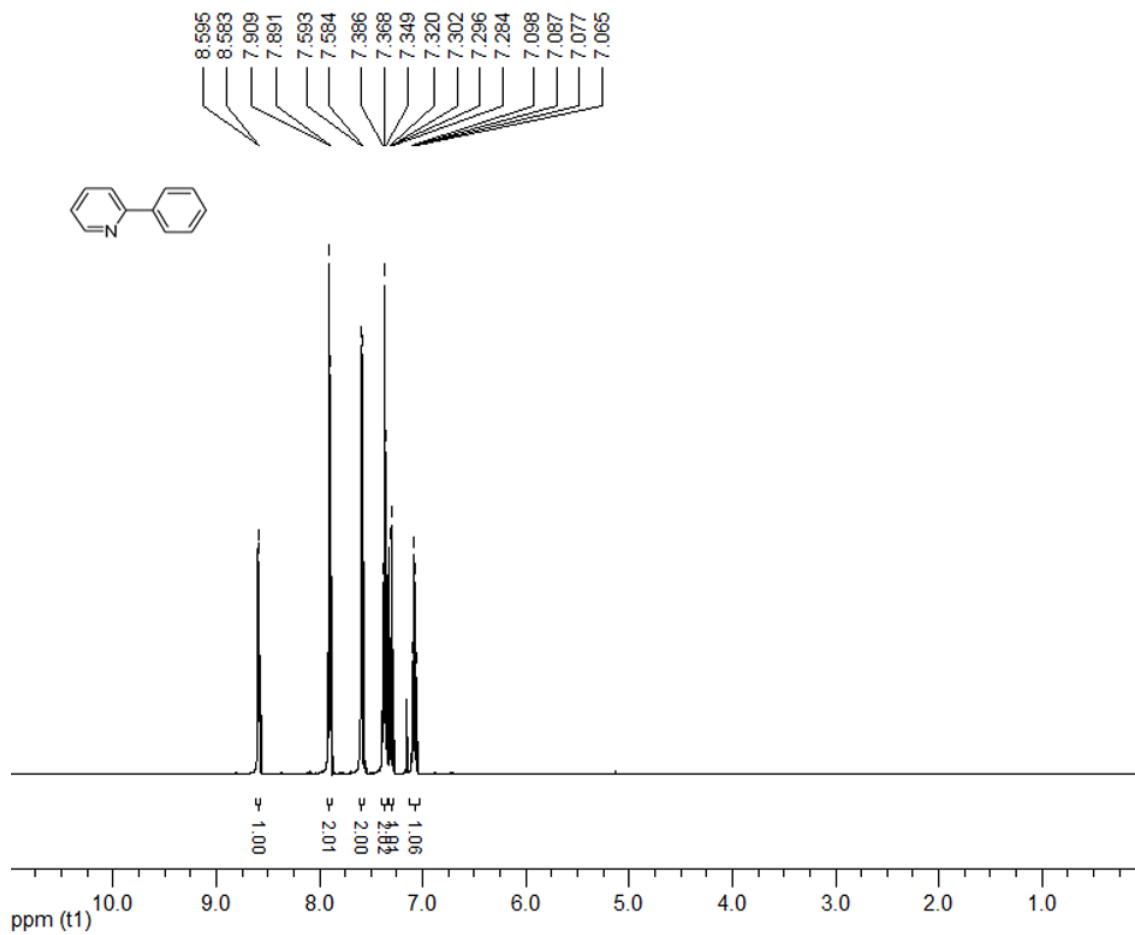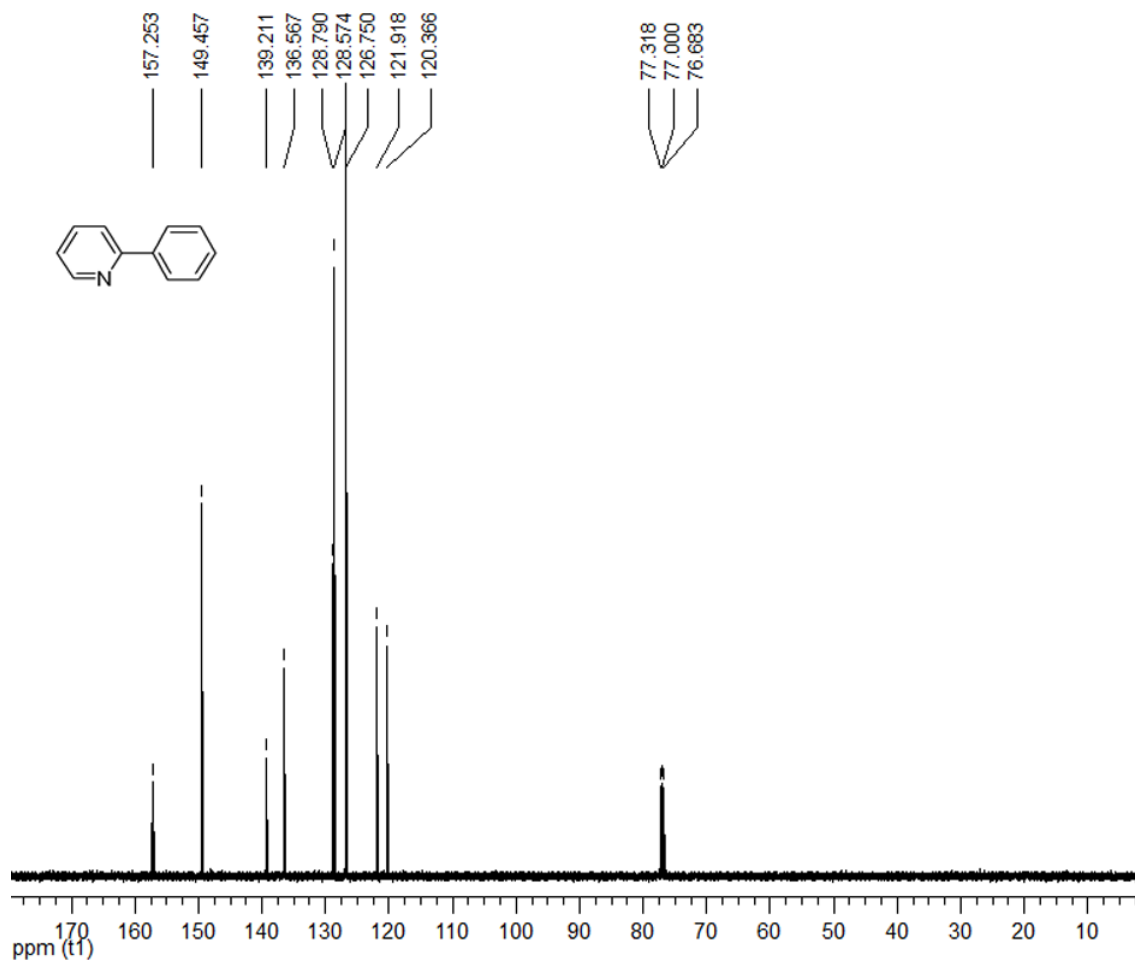

8.752  
8.496  
8.485  
7.782  
7.777  
7.767  
7.763  
7.490  
7.472  
7.399  
7.381  
7.361  
7.323  
7.305  
7.299  
7.286  
7.279  
7.267  
7.259  
7.247

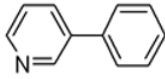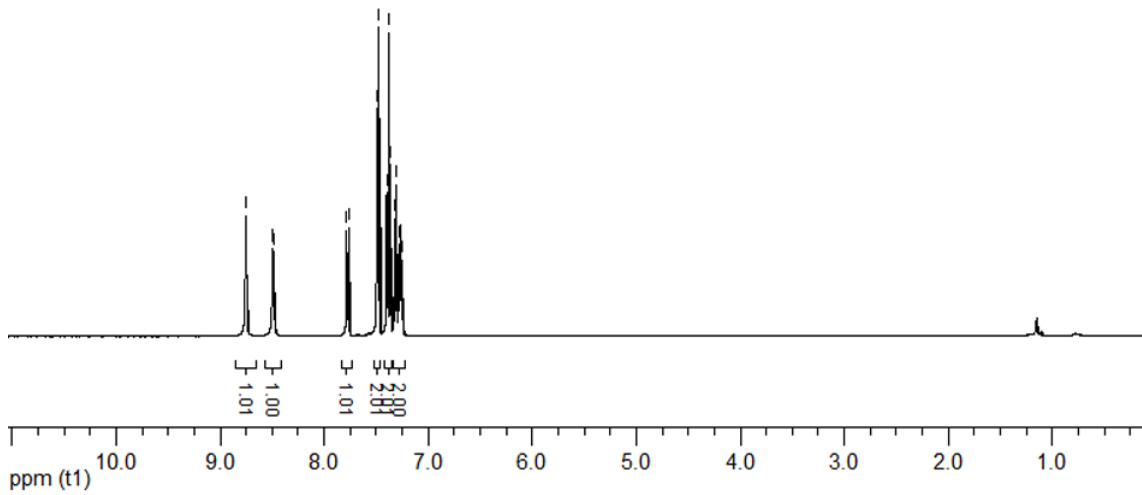

148.410  
148.278  
137.784  
136.619  
134.345  
129.044  
128.067  
127.117  
123.529  
77.319  
77.002  
76.684

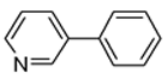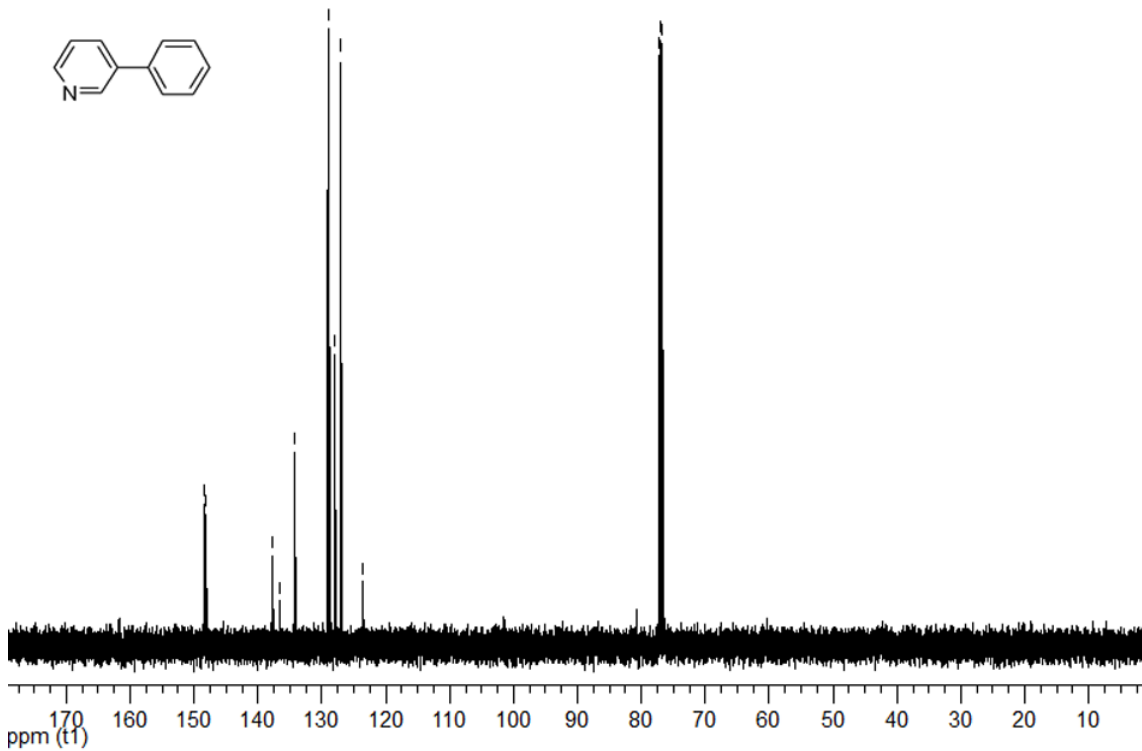

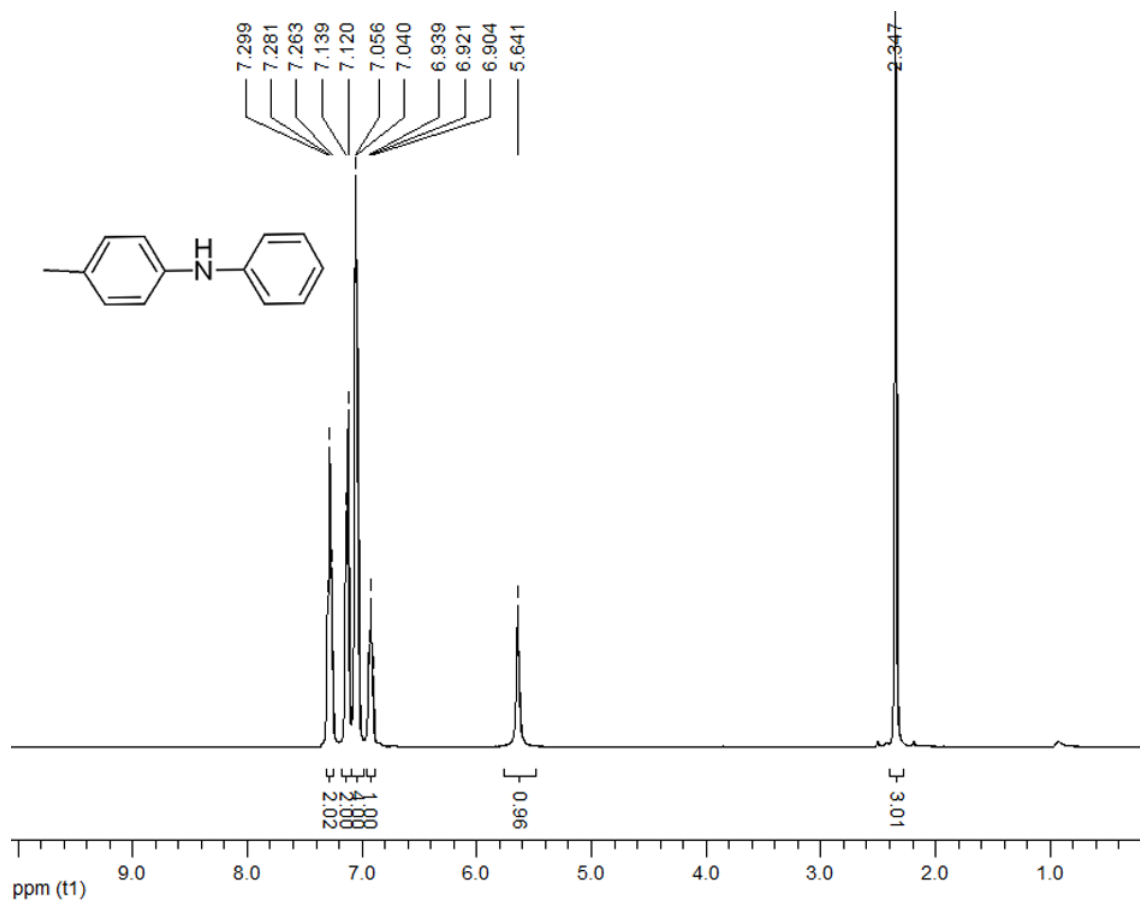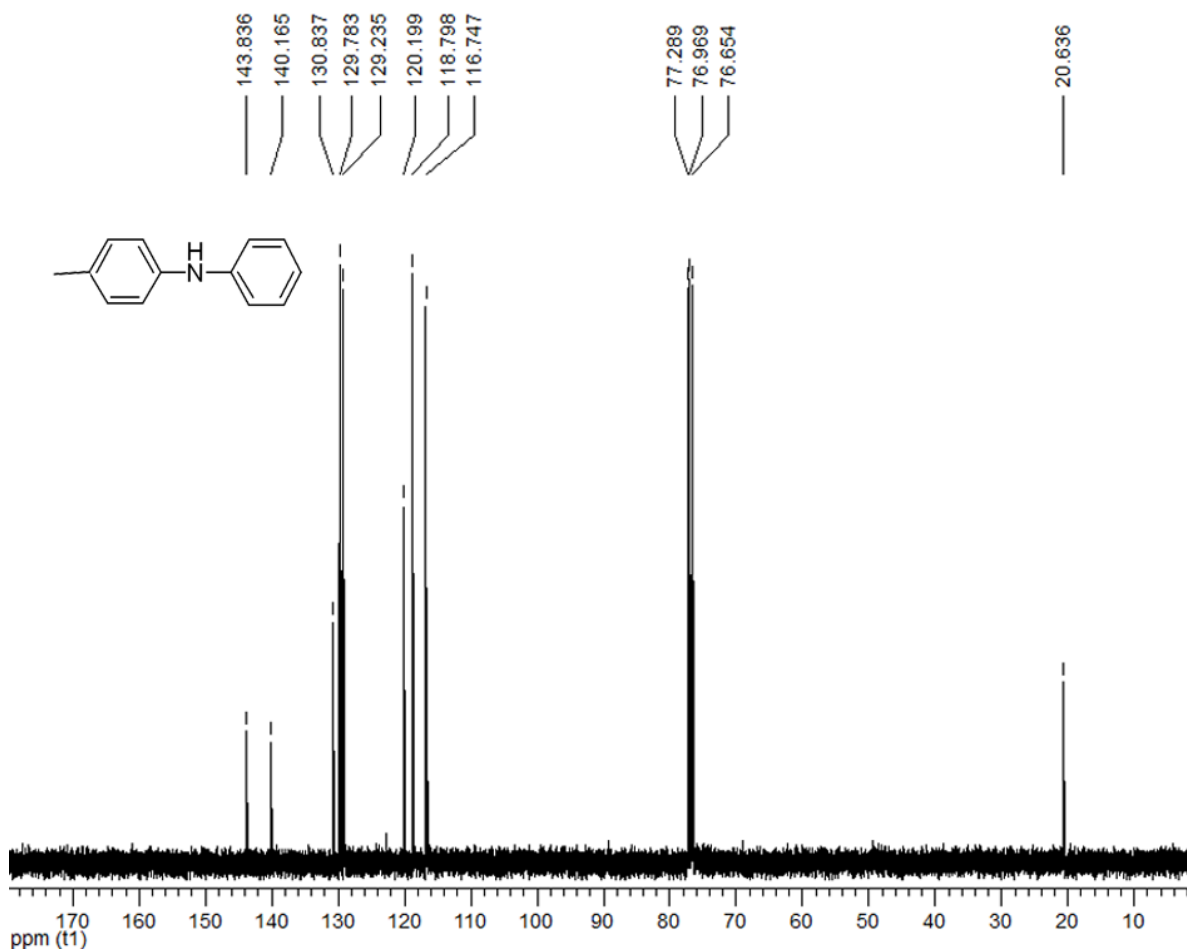

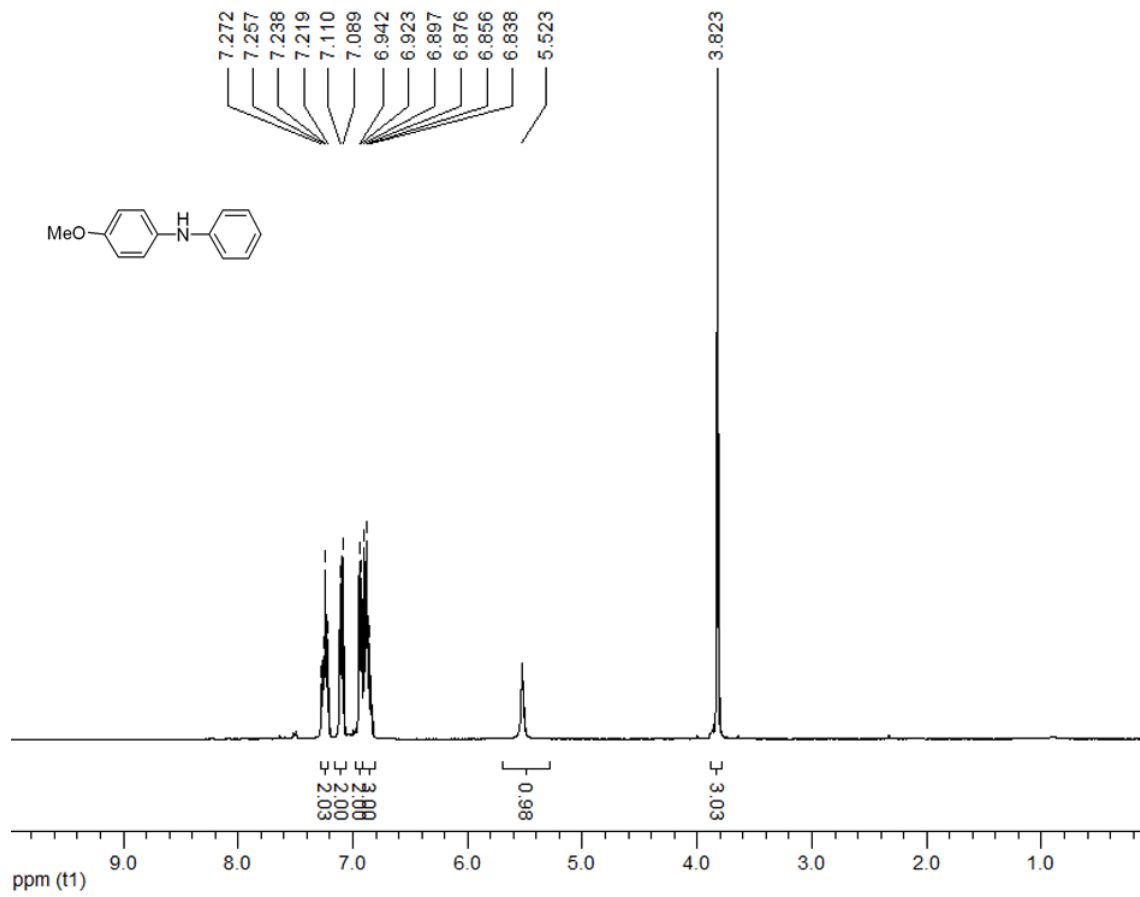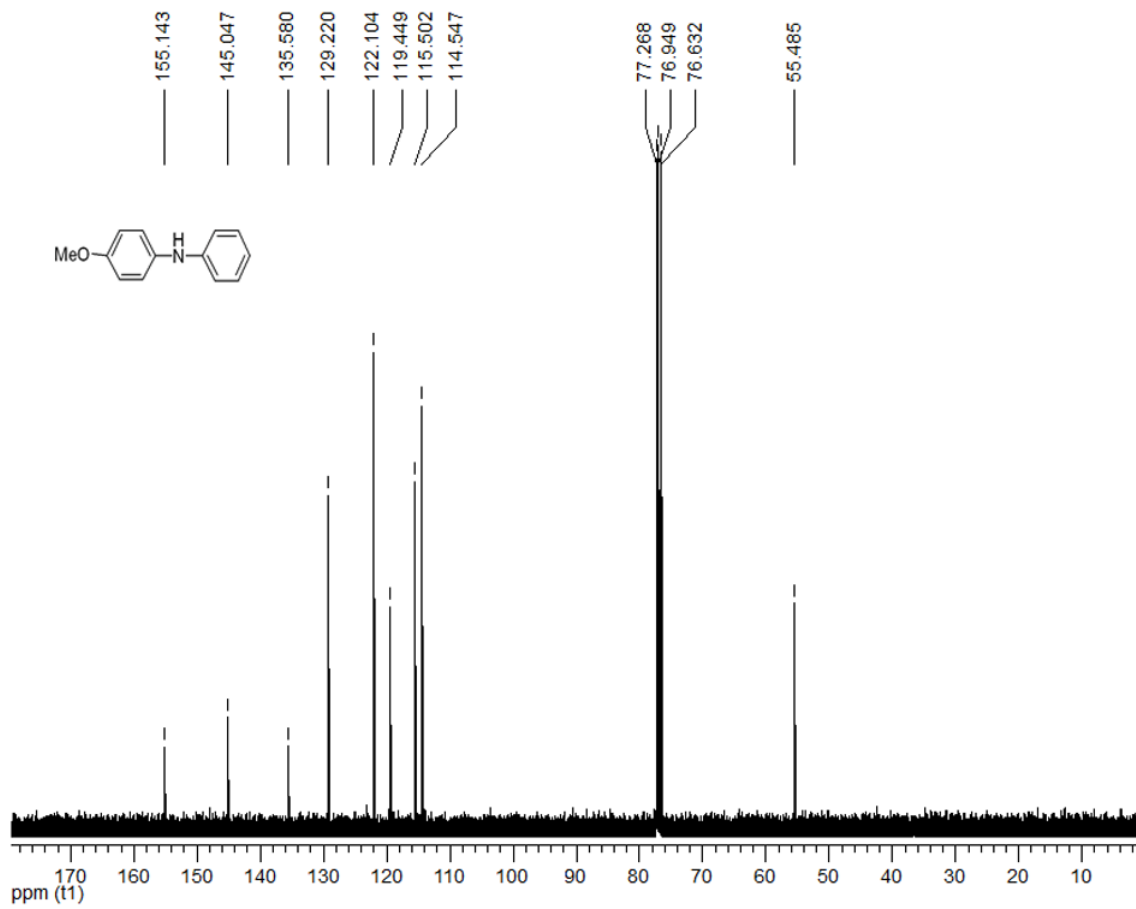

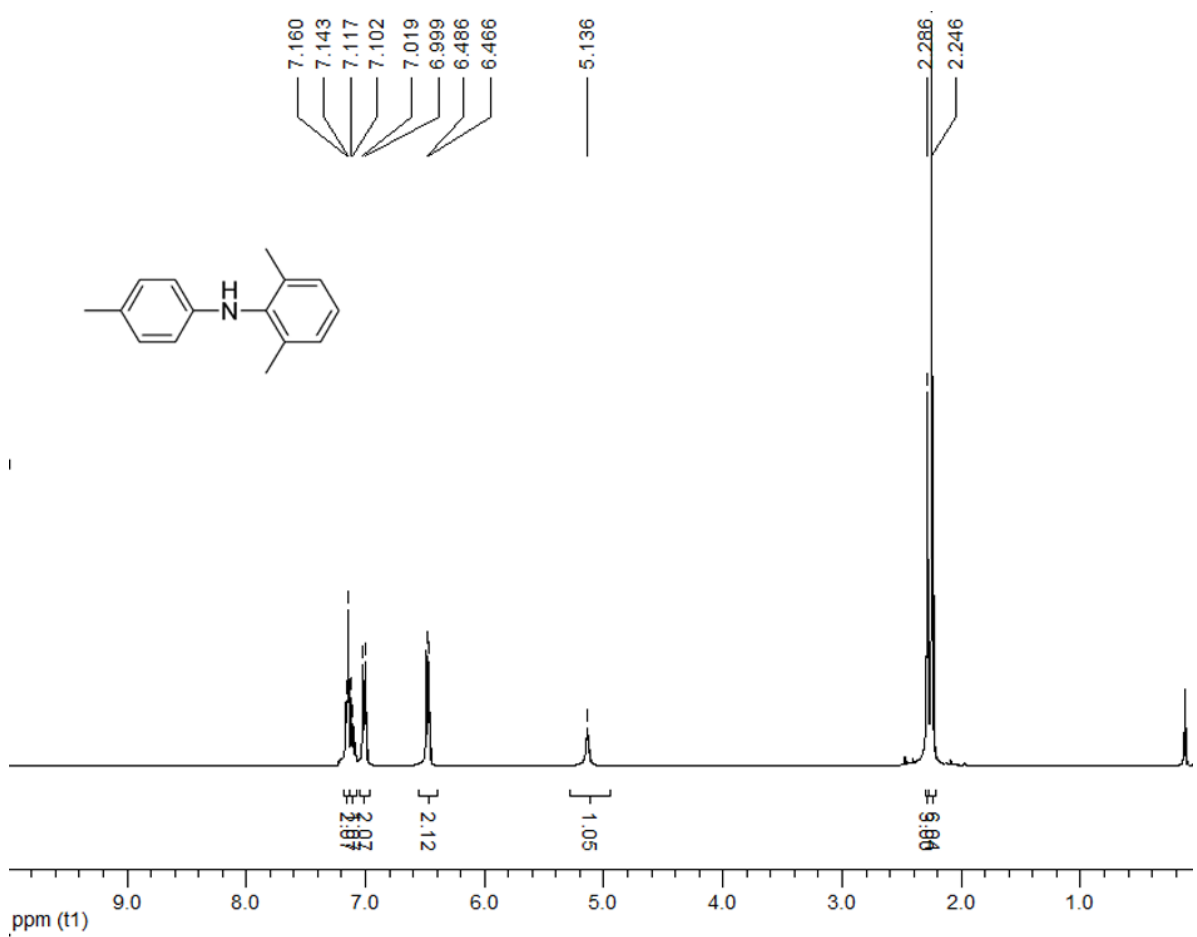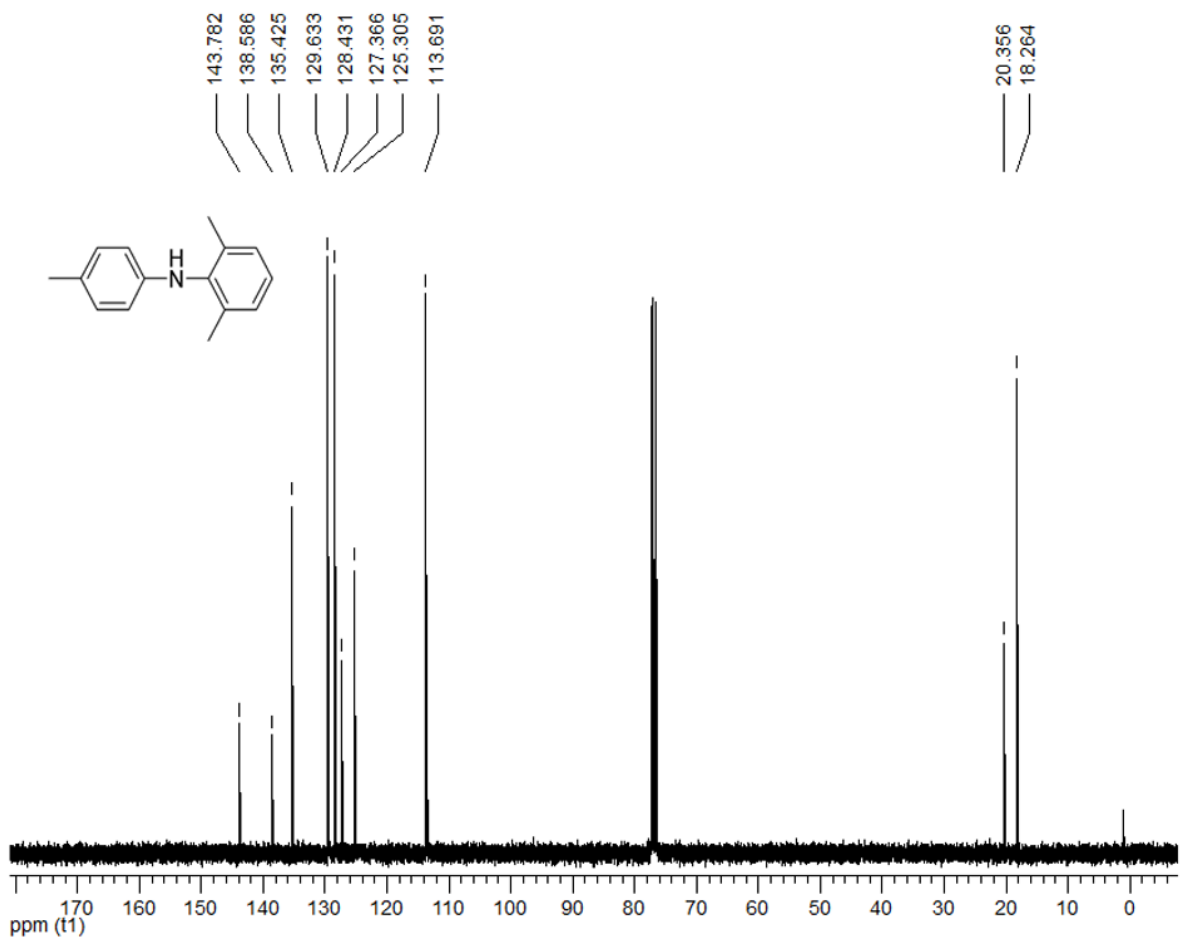

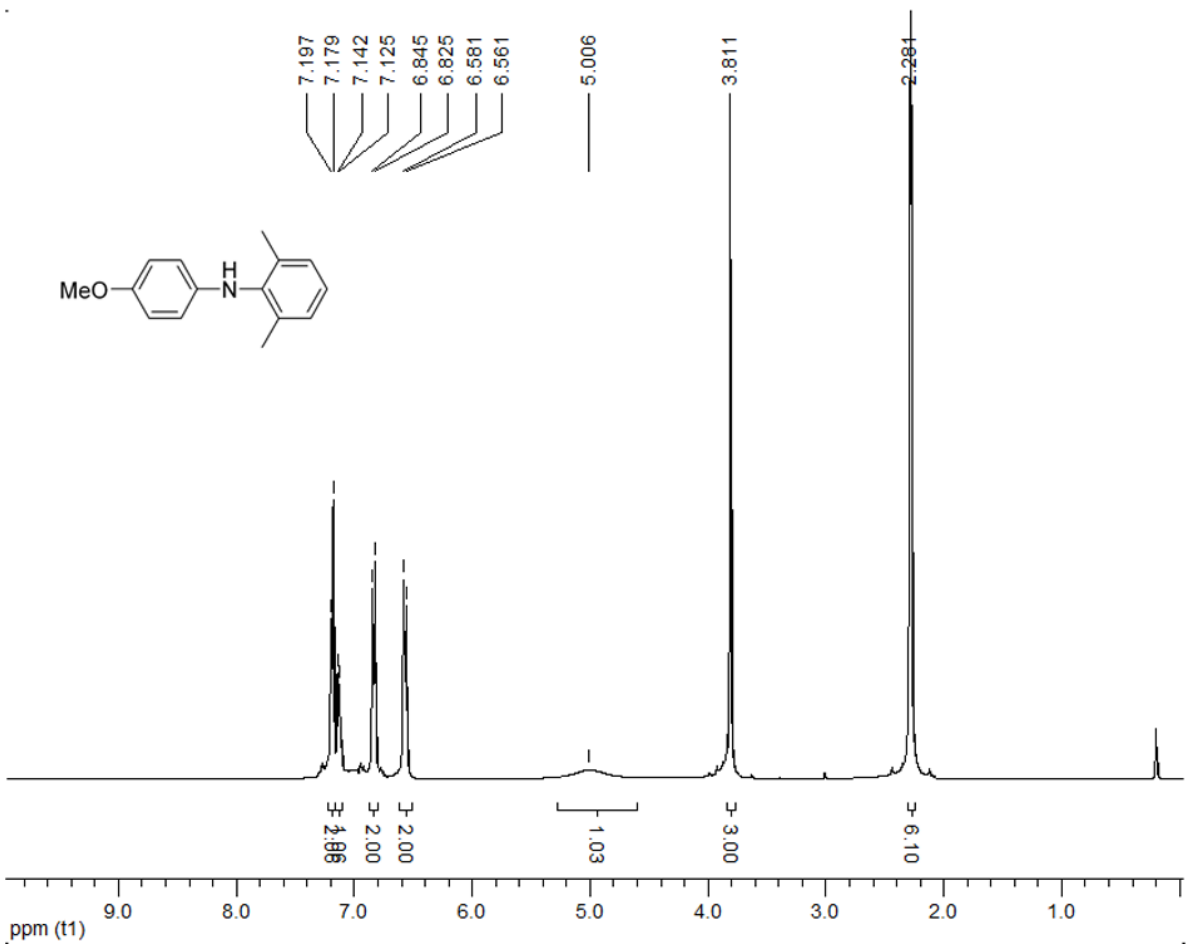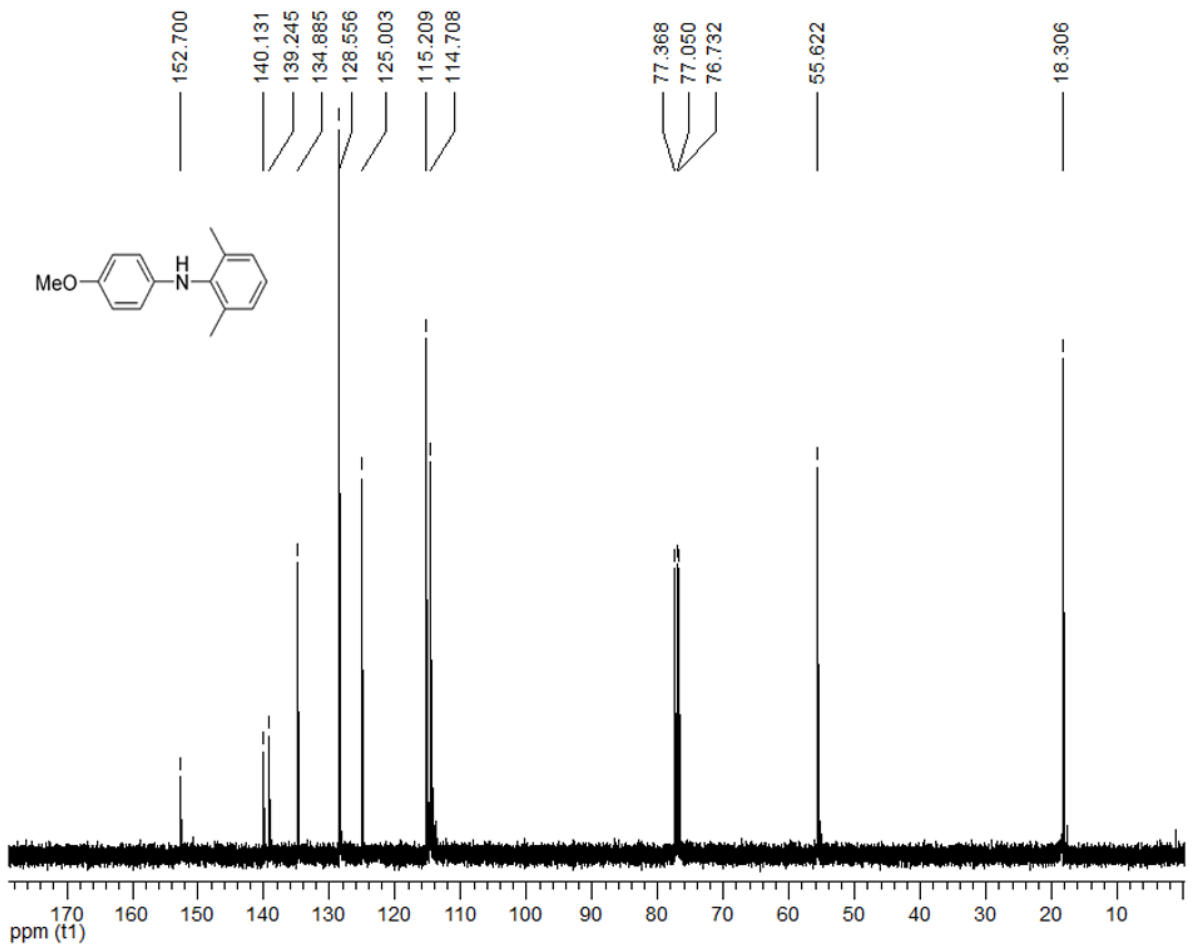

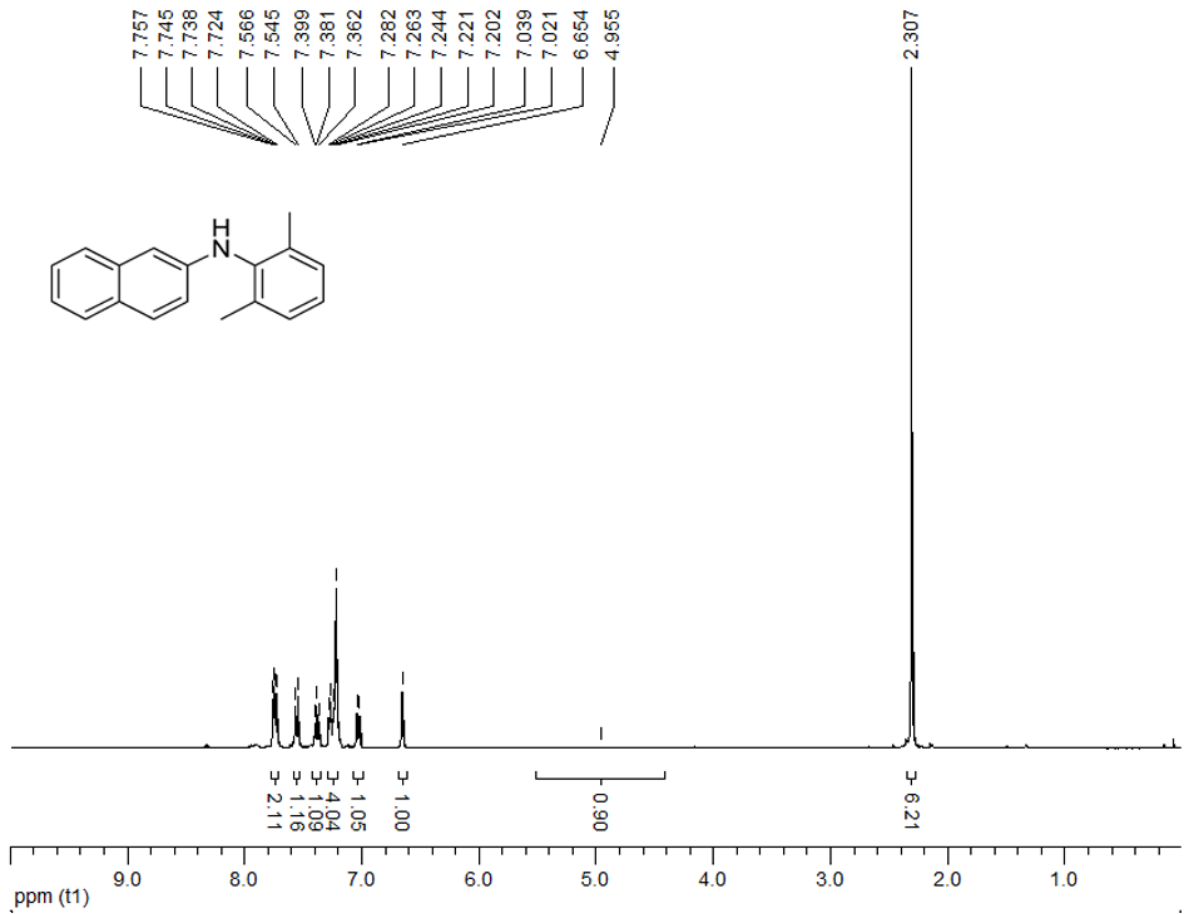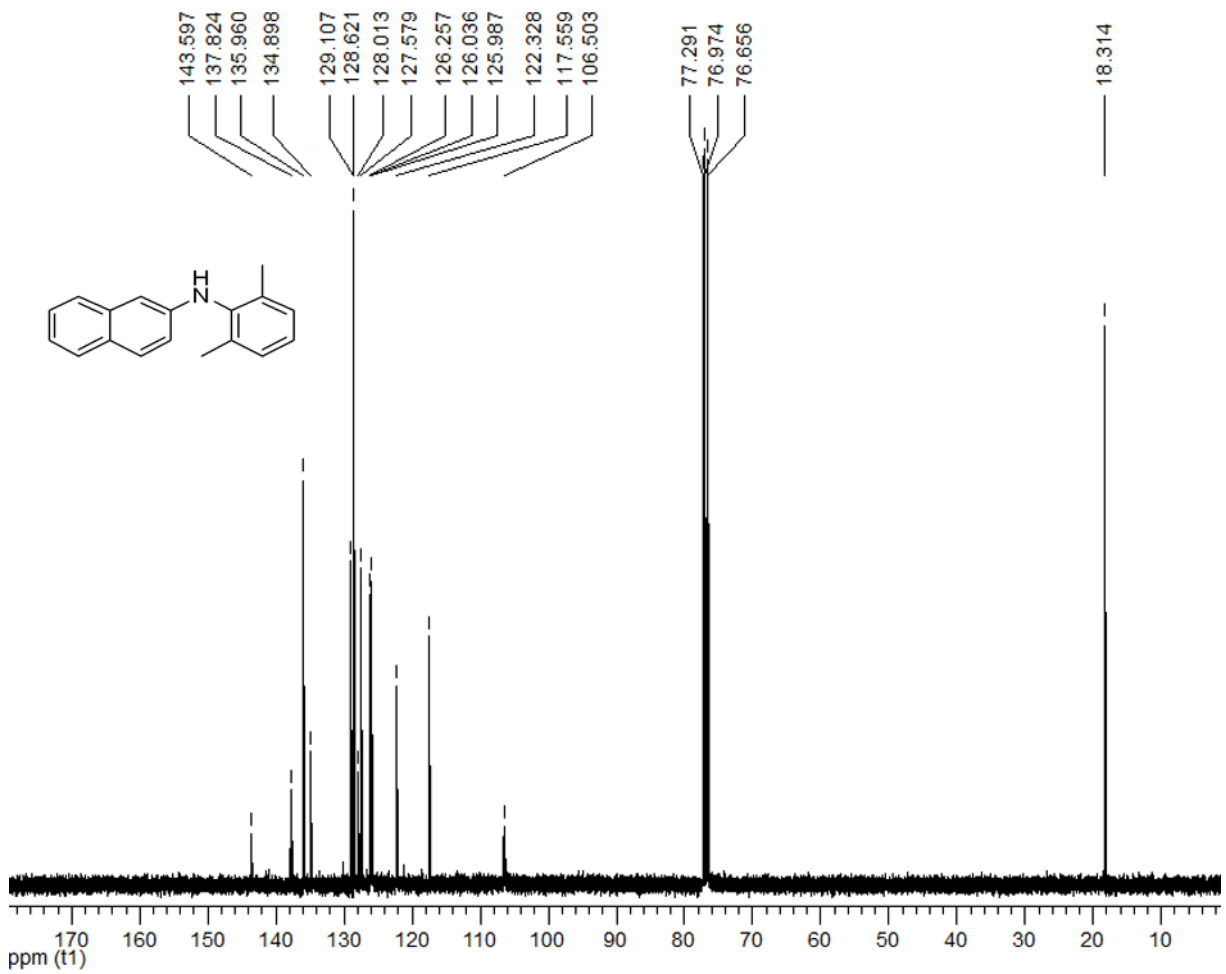

## References

- (1) T. E. Schmid, D. C. Jones, O. Songis, O. Diebolt, M. R. L. Furst, A. M. Z. Slawin and C. S. J. Cazin, *Dalton Trans.*, 2013, **42**, 7345.
- (2) C. Desmarets, R. Schneider and Y. Fort, *J. Org. Chem.*, 2002, **67**, 3029.
- (3) C.-Y. Gao and L.-M. Yang, *J. Org. Chem.*, 2008, **73**, 1624.
